# Supplementary material
Source: Royal Society of Chemistry journal article supplement (doi:10.1039/d6qi00033a)
Supplement: d6qi00033a1.pdf [file d6qi00033a1.pdf]

## Supporting Information

### Two Eu-Doped Polyoxotungstates with Distinct Structures for Multifunctional Integration of Photoluminescence, Proton Conductivity and Resistive Switching

Wen-Jun Mi,<sup>a</sup> Xue-Ru Zhou,<sup>a</sup> Guang-Qu Ke,<sup>a</sup> Bi-Ling Huang,<sup>a</sup> Yi-Ping Chen,<sup>\* a, b</sup> Hao-Hong Li<sup>a</sup>

<sup>a</sup> College of Chemistry, Fuzhou University, Fuzhou, Fujian 350108, China.

<sup>b</sup> State Key Laboratory of Structural Chemistry, Fujian Institute of Research on the Structure of Matter,  
Chinese Academy of Sciences, Fuzhou 350002, China.

### Contents

|                                               |    |
|-----------------------------------------------|----|
| <b>Section S1</b> Experimental Detail.....    | 2  |
| <b>Section S2</b> X-Ray Crystallography ..... | 4  |
| <b>Section S3</b> Additional Table .....      | 6  |
| <b>Section S4</b> Additional Figure .....     | 32 |
| <b>Section S5</b> Notes and references .....  | 44 |

## Section S1 Experimental Detail

**Materials and physical measurements.**  $K_8Na_2[A-a-GeW_9O_{34}] \cdot 25H_2O$  was synthesized according to the reported procedure. Other chemicals are purchased commercially and used without purification. The infrared spectra in the range of 400-4000  $cm^{-1}$  were measured on the Thermo Scientific Nicolet iS50 FT-IR spectrometer by KBr pellets at room temperature. 2D COS-IR was measured on the same instrument equipped with a portable programmable temperature controller (Love Control Corporation) with an operating temperature range of 20 °C to 120 °C, and the magnetic controller with a varying magnetic intensity of 5-50 mT was designed by our group. The X-ray powder diffraction data were measured on a Rigaku Ultima IV X-Ray Diffractometer powder diffractometer, with the Cu-K $\alpha$  radiation angular range of 5-55° and the radiation wavelength of 1.54056 Å. Solid-state UV-vis spectra were measured on a Perkin-Elmer Lambda 800 instrument with a scanning range of 200-800 nm. Thermogravimetric analysis (TGA) was performed using a Mettler Toledo Star TGA /DSCI analyzer under a nitrogen atmosphere at the heating rate of 10 K  $min^{-1}$ . The instrument used for the determination of XPS (X-ray photoelectron spectroscopy) was an ESCALAB 250 photoelectron spectrometer from VG Corporation USA, with Al-K $\alpha$  as the target ray source. Luminescent spectra were collected with an Edinburgh Instruments FS980 TCSPC luminescence spectrometer on the powdered crystal material of the compounds. The measurement of proton conductivity is carried out using alternating current impedance spectroscopy with a dual electrode configuration between  $10^7$  and 0.1Hz. The temperature range is 25 ~ 85 °C, and the relative humidity (RH) range is 55 ~ 98% RH. Use the formula  $\sigma = L/(RS)$  to calculate the conductivity (L, R, S represent thickness (cm), fitting resistance ( $\Omega$ ), and cross-sectional area ( $cm^2$ ), respectively). Ac impedance measurements were carried out with a SI1260 IMPEDANCE/GAINPHASE analyzer over the frequency range from 1 Hz to 10 MHz with an applied voltage of 10 mV. The relative humidity was controlled by a STIKCorp CIHI-150BS3 incubator. The samples were pressed to form a cylindrical pellet of the crystalline powder sample (~1.0 mm thickness  $\times$  5/4.5 mm  $\phi$ ) coated with C-pressed electrodes. Two silver electrodes were attached to both sides of the pellet to form four end terminals (quasi-four-probe method). The bulk conductivity was estimated by semicircle fittings of Nyquist plots. The resistive switching performances were measured by recording the current-voltage ( $I-V$ ) curves on a Keysight B2911A single channel digital source meter.

**Synthesis of 1-Eu:**  $K_8Na_2[A-\alpha-GeW_9O_{34}] \cdot 25H_2O$  (0.50g, 0.20mmol),  $Eu(NO_3)_3 \cdot 6H_2O$  (0.120g, 0.355mmol) and KCl (0.050 g, 0.670 mmol) were dissolved in 3.0 mL distilled water under stirring, then 50  $\mu$ L of ethylenediamine and 50  $\mu$ L 1M dimethylamine hydrochloride were added. The pH value of the solution was then adjusted to 8.50 by using 6M hydrochloric acid. The obtained solution was stirred for 1 hour and then heated at 140°C for 3 days. After cooling to room temperature and washing with mother solution, colorless bulk crystals were obtained. Yield:26.8% (based on  $Na_2WO_4 \cdot 2H_2O$ ). IR for **1-Eu** (KBr,  $cm^{-1}$ ):  $\tilde{\nu} = 3386s, 3129m, 1616s, 1509s, 1321m, 1048m, 928s, 870w, 744m, 651m, 510w$ .

**Synthesis of 2-Eu:**  $K_8Na_2[A-\alpha-GeW_9O_{34}] \cdot 25H_2O$  (0.60g, 0.24mmol),  $Eu(NO_3)_3 \cdot 6H_2O$  (0.170g, 0.503mmol),  $SeO_2$  (0.10g, 0.901 mmol),  $K_2CO_3$  (0.05g, 0.362mmol),  $K_2B_4O_7 \cdot 5H_2O$  (0.05g, 0.124mmol) and  $NH_4B_5O_8 \cdot 4H_2O$  (0.05g, 0.249mmol) were dissolved in 3.0 mL distilled water under stirring. Then, 50  $\mu$ L of ethylenediamine was added. The pH value of the solution was then adjusted to 8.50 by using 6M hydrochloric acid, and 50  $\mu$ L 1M dimethylamine hydrochloride was added. The obtained solution was stirred for 1 hour and then heated at 100°C for 1 day. After cooling to room temperature and washing with mother solution, colorless bulk crystals were obtained. Yield:31.2% (based on  $Na_2WO_4 \cdot 2H_2O$ ). IR for **2-Eu** (KBr,  $cm^{-1}$ ):  $\tilde{\nu} = 3437s, 3147m, 1624s, 1493s, 1321m, 1089s, 940s, 867s, 794s, 747w, 695w, 453m$ .

**Preparation of FTO/Eu-POTs/Ag Devices:** The two compounds were thoroughly ground and separately ultrasonicated in deionized water for 2 hours to form homogeneous suspensions with a concentration of 2 mg/mL. Subsequently, 0.2 mL of each suspension was uniformly deposited onto FTO substrates (20 mm  $\times$  20 mm) via spin-coating at 1000 rpm, followed by annealing at 60°C for 3 hours to remove residual moisture. Finally, the top silver electrodes for all devices were fabricated by applying a 0.5  $mg \cdot mL^{-1}$  silver nanowire suspension through a shadow mask with circular apertures of approximately 0.1 cm in diameter for 1 minute. The fabricated devices were then dried in an oven at 60°C for 30 minutes to enhance adhesion. Devices denoted as FTO/**1-Eu**/Ag and FTO/**2-Eu**/Ag were prepared accordingly. Scanning electron microscopy (SEM) images revealed smooth film surfaces (Figure S12), respectively. X-ray diffraction (XRD) analysis of the devices (Figure S1c, 1f) confirmed the successful formation of the POTs active layer while indicating that the structural integrity of the POTs nano-active materials remained unaltered.

## Section S2 X-Ray Crystallography

**X-ray crystallography:** Single-crystal X-ray diffraction. Crystals were collected on a Bruker APEX III CCD area diffractometer equipped with a fine focus, 2.0 kW sealed tube X-ray source (MoK $\alpha$  radiation,  $\lambda = 0.71073 \text{ \AA}$ ) operating at 296.15K. The empirical absorption correction was based on equivalent reflections. The single crystal data were calculated and solved by SHELXS-97 and Olex2-1.5 programs. For **1-Eu** and **2-Eu**, all atoms are corrected for anisotropy using the least square method, and only the hydrogen atoms participate in the calculation of the structure factors. Detailed crystallographic data tables for **1-Eu** and **2-Eu** are shown in Table S1. CCDC 2512610 and 2512611 contain the crystallographic data for **1-Eu** and **2-Eu**.

**Table S1.** Crystallographic data and structure refinements of **1-Eu** and **2-Eu**.

|                                           | <b>1-Eu</b>                                                                                                                                   | <b>2-Eu</b>                                                                                                                                       |
|-------------------------------------------|-----------------------------------------------------------------------------------------------------------------------------------------------|---------------------------------------------------------------------------------------------------------------------------------------------------|
| Empirical formula                         | C <sub>4</sub> H <sub>80</sub> Eu <sub>8</sub> Ge <sub>4</sub> K <sub>3</sub> N <sub>2</sub> Na <sub>3</sub> O <sub>185</sub> W <sub>43</sub> | C <sub>2</sub> H <sub>82</sub> Eu <sub>22</sub> Ge <sub>8</sub> K <sub>7</sub> NNa <sub>2</sub> O <sub>404</sub> Se <sub>24</sub> W <sub>80</sub> |
| Formula weight                            | 12666.52                                                                                                                                      | 27423.7                                                                                                                                           |
| Crystal system                            | monoclinic                                                                                                                                    | orthorhombic                                                                                                                                      |
| Space group                               | C2/c                                                                                                                                          | Pna2 <sub>1</sub>                                                                                                                                 |
| <i>a</i> , Å                              | 83.660(8)                                                                                                                                     | 26.845(2)                                                                                                                                         |
| <i>b</i> , Å                              | 22.102(2)                                                                                                                                     | 40.935(4)                                                                                                                                         |
| <i>c</i> , Å                              | 24.206(2)                                                                                                                                     | 46.807(4)                                                                                                                                         |
| $\alpha$ , deg                            | 90                                                                                                                                            | 90                                                                                                                                                |
| $\beta$ , deg                             | 98.037(2)                                                                                                                                     | 90                                                                                                                                                |
| $\gamma$ , deg                            | 90                                                                                                                                            | 90                                                                                                                                                |
| <i>V</i> , Å <sup>3</sup>                 | 44320(7)                                                                                                                                      | 51437(8)                                                                                                                                          |
| <i>Z</i>                                  | 8                                                                                                                                             | 4                                                                                                                                                 |
| $\mu$ , mm <sup>-1</sup>                  | 25.142                                                                                                                                        | 22.740                                                                                                                                            |
| <i>F</i> (000)                            | 43391                                                                                                                                         | 47125                                                                                                                                             |
| <i>D<sub>c</sub></i> , g cm <sup>-3</sup> | 3.788                                                                                                                                         | 3.531                                                                                                                                             |
| <i>T</i> , K                              | 297K                                                                                                                                          | 297K                                                                                                                                              |
| Limiting indices                          | -99 ≤ <i>h</i> ≤ 99<br>-26 ≤ <i>k</i> ≤ 26<br>-28 ≤ <i>l</i> ≤ 27                                                                             | -32 ≤ <i>h</i> ≤ 23<br>-48 ≤ <i>k</i> ≤ 48<br>-55 ≤ <i>l</i> ≤ 55                                                                                 |

|                                 |                |                     |
|---------------------------------|----------------|---------------------|
| Reflections<br>collected/unique | 337041/39136   | 426244/89809        |
| $R_{\text{int}}$                | 0.1117         | 0.0987              |
| Data/restraints/parameters      | 39136/226/2223 | 89809 / 7165 / 4859 |
| $GOF$ on $F^2$                  | 1.083          | 1.047               |
| $R_1, wR_2 (I > 2\sigma(I))^a$  | 0.0989/0.2316  | 0.0673/0.1631       |
| $R_1, wR_2$ (all data)          | 0.1339/0.2552  | 0.1123/0.1957       |

---

$$^a R_1 = \frac{\sum ||F_o| - |F_c||}{\sum |F_o|}, \quad ^b wR_2 = \left\{ \frac{\sum [w(F_o^2 - F_c^2)^2]}{\sum [w(F_o^2)^2]} \right\}^{1/2}$$

## Section S3 Additional Table

**Table S2.** CShM values of Eu(III) ions in **1-Eu**.

| Central atom                                              | Coordination polyhedron                                   | CShM         |
|-----------------------------------------------------------|-----------------------------------------------------------|--------------|
| Eu1                                                       | Enneagon ( $D_{9h}$ )                                     | 30.701       |
|                                                           | Octagonal pyramid ( $C_{8v}$ )                            | 21.821       |
|                                                           | Hexagonal bipyramid ( $D_{7h}$ )                          | 19.903       |
|                                                           | Johnson triangular cupola ( $C_{3v}$ )                    | 12.206       |
|                                                           | Capped cube ( $C_{4v}$ )                                  | 9.267        |
|                                                           | Spherical-relaxed capped cube ( $C_{4v}$ )                | 9.467        |
|                                                           | Capped square antiprism J10 ( $C_{4v}$ )                  | 2.137        |
|                                                           | Spherical capped square antiprism ( $C_{4v}$ )            | 2.293        |
|                                                           | <b>Tricapped trigonal prism J51 (<math>D_{3h}</math>)</b> | <b>1.485</b> |
| Eu2                                                       | Octagon ( $D_{8h}$ )                                      | 23.489       |
|                                                           | Heptagonal pyramid ( $C_{7v}$ )                           | 19.726       |
|                                                           | Hexagonal bipyramid ( $D_{6h}$ )                          | 16.892       |
|                                                           | Cube ( $O_h$ )                                            | 15.311       |
|                                                           | Square antiprism ( $D_{4d}$ )                             | 5.286        |
|                                                           | <b>Triangular dodecahedron (<math>D_{2d}</math>)</b>      | <b>3.945</b> |
|                                                           | Johnson gyrobifastigium J26 ( $D_{2d}$ )                  | 13.012       |
| Johnson elongated triangular bipyramid J14 ( $D_{3h}$ )   | 22.602                                                    |              |
| Eu3                                                       | Enneagon ( $D_{9h}$ )                                     | 31.086       |
|                                                           | Octagonal pyramid ( $C_{8v}$ )                            | 22.225       |
|                                                           | Hexagonal bipyramid ( $D_{7h}$ )                          | 20.107       |
|                                                           | Johnson triangular cupola ( $C_{3v}$ )                    | 12.121       |
|                                                           | Capped cube ( $C_{4v}$ )                                  | 8.767        |
|                                                           | Spherical-relaxed capped cube ( $C_{4v}$ )                | 9.195        |
|                                                           | Capped square antiprism J10 ( $C_{4v}$ )                  | 1.901        |
|                                                           | Spherical capped square antiprism ( $C_{4v}$ )            | 2.275        |
| <b>Tricapped trigonal prism J51 (<math>D_{3h}</math>)</b> | <b>1.590</b>                                              |              |
| Eu4                                                       | Octagon ( $D_{8h}$ )                                      | 30.550       |
|                                                           | Heptagonal pyramid ( $C_{7v}$ )                           | 21.297       |
|                                                           | Hexagonal bipyramid ( $D_{6h}$ )                          | 13.636       |
|                                                           | Cube ( $O_h$ )                                            | 10.198       |
|                                                           | Square antiprism ( $D_{4d}$ )                             | 4.175        |
|                                                           | <b>Triangular dodecahedron (<math>D_{2d}</math>)</b>      | <b>2.993</b> |
|                                                           | Johnson gyrobifastigium J26 ( $D_{2d}$ )                  | 12.547       |
| Johnson elongated triangular bipyramid J14 ( $D_{3h}$ )   | 22.698                                                    |              |
| Eu5                                                       | Octagon ( $D_{8h}$ )                                      | 29.774       |
|                                                           | Heptagonal pyramid ( $C_{7v}$ )                           | 23.646       |
|                                                           | Hexagonal bipyramid ( $D_{6h}$ )                          | 15.565       |

|     |                                                         |              |
|-----|---------------------------------------------------------|--------------|
|     | Cube ( $O_h$ )                                          | 14.104       |
|     | Square antiprism ( $D_{4d}$ )                           | 4.375        |
|     | <b>Triangular dodecahedron (<math>D_{2d}</math>)</b>    | <b>2.341</b> |
|     | Johnson gyrobifastigium J26 ( $D_{2d}$ )                | 10.114       |
|     | Johnson elongated triangular bipyramid J14 ( $D_{3h}$ ) | 24.442       |
|     | Octagon ( $D_{8h}$ )                                    | 23.041       |
|     | Heptagonal pyramid ( $C_{7v}$ )                         | 19.327       |
|     | Hexagonal bipyramid ( $D_{6h}$ )                        | 16.392       |
| Eu6 | Cube ( $O_h$ )                                          | 16.853       |
|     | Square antiprism ( $D_{4d}$ )                           | 6.199        |
|     | <b>Triangular dodecahedron (<math>D_{2d}</math>)</b>    | <b>5.097</b> |
|     | Johnson gyrobifastigium J26 ( $D_{2d}$ )                | 12.285       |
|     | Johnson elongated triangular bipyramid J14 ( $D_{3h}$ ) | 21.820       |
|     | Octagon ( $D_{8h}$ )                                    | 31.318       |
|     | Heptagonal pyramid ( $C_{7v}$ )                         | 21.970       |
|     | Hexagonal bipyramid ( $D_{6h}$ )                        | 14.140       |
| Eu7 | Cube ( $O_h$ )                                          | 10.237       |
|     | Square antiprism ( $D_{4d}$ )                           | 3.330        |
|     | <b>Triangular dodecahedron (<math>D_{2d}</math>)</b>    | <b>2.426</b> |
|     | Johnson gyrobifastigium J26 ( $D_{2d}$ )                | 12.980       |
|     | Johnson elongated triangular bipyramid J14 ( $D_{3h}$ ) | 24.690       |
|     | Octagon ( $D_{8h}$ )                                    | 31.122       |
|     | Heptagonal pyramid ( $C_{7v}$ )                         | 23.143       |
|     | Hexagonal bipyramid ( $D_{6h}$ )                        | 16.516       |
| Eu8 | Cube ( $O_h$ )                                          | 13.868       |
|     | Square antiprism ( $D_{4d}$ )                           | 4.903        |
|     | <b>Triangular dodecahedron (<math>D_{2d}</math>)</b>    | <b>2.482</b> |
|     | Johnson gyrobifastigium J26 ( $D_{2d}$ )                | 10.898       |
|     | Johnson elongated triangular bipyramid J14 ( $D_{3h}$ ) | 24.129       |

**Table S3.** CShM values of Eu(III) ions in **2-Eu**.

| Central atom | Coordination polyhedron                                 | CShM         |
|--------------|---------------------------------------------------------|--------------|
|              | Octagon ( $D_{8h}$ )                                    | 31.001       |
|              | Heptagonal pyramid ( $C_{7v}$ )                         | 23.736       |
|              | Hexagonal bipyramid ( $D_{6h}$ )                        | 14.608       |
| Eu1          | Cube ( $O_h$ )                                          | 10.289       |
|              | Square antiprism ( $D_{4d}$ )                           | 3.099        |
|              | <b>Triangular dodecahedron (<math>D_{2d}</math>)</b>    | <b>2.214</b> |
|              | Johnson gyrobifastigium J26 ( $D_{2d}$ )                | 10.722       |
|              | Johnson elongated triangular bipyramid J14 ( $D_{3h}$ ) | 24.493       |

|                                                           |                                                                |              |
|-----------------------------------------------------------|----------------------------------------------------------------|--------------|
| Eu2                                                       | Enneagon ( $D_{9h}$ )                                          | 30.878       |
|                                                           | Octagonal pyramid ( $C_{8v}$ )                                 | 22.158       |
|                                                           | Hexagonal bipyramid ( $D_{7h}$ )                               | 17.412       |
|                                                           | Johnson triangular cupola ( $C_{3v}$ )                         | 10.363       |
|                                                           | Capped cube ( $C_{4v}$ )                                       | 8.125        |
|                                                           | Spherical-relaxed capped cube ( $C_{4v}$ )                     | 7.384        |
|                                                           | Capped square antiprism J10 ( $C_{4v}$ )                       | 2.650        |
|                                                           | Spherical capped square antiprism ( $C_{4v}$ )                 | 2.137        |
| <b>Tricapped trigonal prism J51 (<math>D_{3h}</math>)</b> |                                                                | <b>1.819</b> |
| Eu3                                                       | Enneagon ( $D_{9h}$ )                                          | 34.502       |
|                                                           | Octagonal pyramid ( $C_{8v}$ )                                 | 22.383       |
|                                                           | Hexagonal bipyramid ( $D_{7h}$ )                               | 17.130       |
|                                                           | Johnson triangular cupola ( $C_{3v}$ )                         | 13.642       |
|                                                           | Capped cube ( $C_{4v}$ )                                       | 8.961        |
|                                                           | Spherical-relaxed capped cube ( $C_{4v}$ )                     | 7.712        |
|                                                           | Capped square antiprism J10 ( $C_{4v}$ )                       | 2.684        |
|                                                           | <b>Spherical capped square antiprism (<math>C_{4v}</math>)</b> | <b>1.797</b> |
| Tricapped trigonal prism J51 ( $D_{3h}$ )                 | 3.027                                                          |              |
| Eu4                                                       | Octagon ( $D_{8h}$ )                                           | 31.120       |
|                                                           | Heptagonal pyramid ( $C_{7v}$ )                                | 23.167       |
|                                                           | Hexagonal bipyramid ( $D_{6h}$ )                               | 16.335       |
|                                                           | Cube ( $O_h$ )                                                 | 11.735       |
|                                                           | Square antiprism ( $D_{4d}$ )                                  | 3.276        |
|                                                           | <b>Triangular dodecahedron (<math>D_{2d}</math>)</b>           | <b>0.910</b> |
|                                                           | Johnson gyrobifastigium J26 ( $D_{2d}$ )                       | 11.543       |
| Johnson elongated triangular bipyramid J14 ( $D_{3h}$ )   | 27.018                                                         |              |
| Eu5                                                       | Enneagon ( $D_{9h}$ )                                          | 31.938       |
|                                                           | Octagonal pyramid ( $C_{8v}$ )                                 | 21.950       |
|                                                           | Hexagonal bipyramid ( $D_{7h}$ )                               | 19.627       |
|                                                           | Johnson triangular cupola ( $C_{3v}$ )                         | 12.622       |
|                                                           | Capped cube ( $C_{4v}$ )                                       | 10.102       |
|                                                           | Spherical-relaxed capped cube ( $C_{4v}$ )                     | 9.369        |
|                                                           | Capped square antiprism J10 ( $C_{4v}$ )                       | 1.779        |
|                                                           | <b>Spherical capped square antiprism (<math>C_{4v}</math>)</b> | <b>1.263</b> |
| Tricapped trigonal prism J51 ( $D_{3h}$ )                 | 1.987                                                          |              |
| Eu6                                                       | Octagon ( $D_{8h}$ )                                           | 31.767       |
|                                                           | Heptagonal pyramid ( $C_{7v}$ )                                | 23.789       |
|                                                           | Hexagonal bipyramid ( $D_{6h}$ )                               | 14.712       |
|                                                           | Cube ( $O_h$ )                                                 | 13.088       |
|                                                           | Square antiprism ( $D_{4d}$ )                                  | 3.478        |

|      |                                                         |              |
|------|---------------------------------------------------------|--------------|
|      | <b>Triangular dodecahedron (<math>D_{2d}</math>)</b>    | <b>1.256</b> |
|      | Johnson gyrobifastigium J26 ( $D_{2d}$ )                | 9.727        |
|      | Johnson elongated triangular bipyramid J14 ( $D_{3h}$ ) | 27.334       |
|      | Octagon ( $D_{8h}$ )                                    | 31.632       |
|      | Heptagonal pyramid ( $C_{7v}$ )                         | 22.793       |
|      | Hexagonal bipyramid ( $D_{6h}$ )                        | 15.904       |
| Eu7  | Cube ( $O_h$ )                                          | 11.486       |
|      | Square antiprism ( $D_{4d}$ )                           | 3.318        |
|      | <b>Triangular dodecahedron (<math>D_{2d}</math>)</b>    | <b>0.925</b> |
|      | Johnson gyrobifastigium J26 ( $D_{2d}$ )                | 11.367       |
|      | Johnson elongated triangular bipyramid J14 ( $D_{3h}$ ) | 27.582       |
|      | Octagon ( $D_{8h}$ )                                    | 30.310       |
|      | Heptagonal pyramid ( $C_{7v}$ )                         | 23.981       |
|      | Hexagonal bipyramid ( $D_{6h}$ )                        | 15.355       |
| Eu8  | Cube ( $O_h$ )                                          | 12.161       |
|      | Square antiprism ( $D_{4d}$ )                           | 2.749        |
|      | <b>Triangular dodecahedron (<math>D_{2d}</math>)</b>    | <b>1.886</b> |
|      | Johnson gyrobifastigium J26 ( $D_{2d}$ )                | 10.169       |
|      | Johnson elongated triangular bipyramid J14 ( $D_{3h}$ ) | 26.385       |
|      | Octagon ( $D_{8h}$ )                                    | 30.505       |
|      | Heptagonal pyramid ( $C_{7v}$ )                         | 24.365       |
|      | Hexagonal bipyramid ( $D_{6h}$ )                        | 15.233       |
| Eu9  | Cube ( $O_h$ )                                          | 11.992       |
|      | Square antiprism ( $D_{4d}$ )                           | 2.837        |
|      | <b>Triangular dodecahedron (<math>D_{2d}</math>)</b>    | <b>2.015</b> |
|      | Johnson gyrobifastigium J26 ( $D_{2d}$ )                | 10.005       |
|      | Johnson elongated triangular bipyramid J14 ( $D_{3h}$ ) | 26.065       |
|      | Octagon ( $D_{8h}$ )                                    | 28.723       |
|      | Heptagonal pyramid ( $C_{7v}$ )                         | 20.866       |
|      | Hexagonal bipyramid ( $D_{6h}$ )                        | 17.248       |
| Eu10 | Cube ( $O_h$ )                                          | 13.445       |
|      | Square antiprism ( $D_{4d}$ )                           | 3.943        |
|      | <b>Triangular dodecahedron (<math>D_{2d}</math>)</b>    | <b>3.105</b> |
|      | Johnson gyrobifastigium J26 ( $D_{2d}$ )                | 13.091       |
|      | Johnson elongated triangular bipyramid J14 ( $D_{3h}$ ) | 24.507       |
|      | Octagon ( $D_{8h}$ )                                    | 30.325       |
|      | Heptagonal pyramid ( $C_{7v}$ )                         | 23.793       |
| Eu11 | Hexagonal bipyramid ( $D_{6h}$ )                        | 14.931       |
|      | Cube ( $O_h$ )                                          | 13.220       |
|      | Square antiprism ( $D_{4d}$ )                           | 3.741        |

|      |                                                           |              |
|------|-----------------------------------------------------------|--------------|
|      | <b>Triangular dodecahedron (<math>D_{2d}</math>)</b>      | <b>1.391</b> |
|      | Johnson gyrobifastigium J26 ( $D_{2d}$ )                  | 10.367       |
|      | Johnson elongated triangular bipyramid J14 ( $D_{3h}$ )   | 26.537       |
| Eu12 | Octagon ( $D_{8h}$ )                                      | 31.766       |
|      | Heptagonal pyramid ( $C_{7v}$ )                           | 24.470       |
|      | Hexagonal bipyramid ( $D_{6h}$ )                          | 15.576       |
|      | Cube ( $O_h$ )                                            | 12.995       |
|      | Square antiprism ( $D_{4d}$ )                             | 3.275        |
|      | <b>Triangular dodecahedron (<math>D_{2d}</math>)</b>      | <b>1.619</b> |
|      | Johnson gyrobifastigium J26 ( $D_{2d}$ )                  | 9.989        |
|      | Johnson elongated triangular bipyramid J14 ( $D_{3h}$ )   | 27.573       |
|      | Octagon ( $D_{8h}$ )                                      | 32.036       |
|      | Heptagonal pyramid ( $C_{7v}$ )                           | 23.520       |
| Eu13 | Hexagonal bipyramid ( $D_{6h}$ )                          | 15.453       |
|      | Cube ( $O_h$ )                                            | 12.841       |
|      | Square antiprism ( $D_{4d}$ )                             | 3.276        |
|      | <b>Triangular dodecahedron (<math>D_{2d}</math>)</b>      | <b>1.458</b> |
|      | Johnson gyrobifastigium J26 ( $D_{2d}$ )                  | 10.552       |
|      | Johnson elongated triangular bipyramid J14 ( $D_{3h}$ )   | 26.545       |
|      | Enneagon ( $D_{9h}$ )                                     | 31.621       |
|      | Octagonal pyramid ( $C_{8v}$ )                            | 23.328       |
|      | Hexagonal bipyramid ( $D_{7h}$ )                          | 18.172       |
|      | Johnson triangular cupola ( $C_{3v}$ )                    | 11.287       |
| Eu14 | Capped cube ( $C_{4v}$ )                                  | 8.426        |
|      | Spherical-relaxed capped cube ( $C_{4v}$ )                | 7.654        |
|      | Capped square antiprism J10 ( $C_{4v}$ )                  | 2.592        |
|      | Spherical capped square antiprism ( $C_{4v}$ )            | 2.040        |
|      | <b>Tricapped trigonal prism J51 (<math>D_{3h}</math>)</b> | <b>1.701</b> |
|      | Octagon ( $D_{8h}$ )                                      | 29.273       |
|      | Heptagonal pyramid ( $C_{7v}$ )                           | 20.689       |
|      | Hexagonal bipyramid ( $D_{6h}$ )                          | 17.467       |
| Eu15 | Cube ( $O_h$ )                                            | 14.141       |
|      | Square antiprism ( $D_{4d}$ )                             | 3.766        |
|      | <b>Triangular dodecahedron (<math>D_{2d}</math>)</b>      | <b>3.070</b> |
|      | Johnson gyrobifastigium J26 ( $D_{2d}$ )                  | 14.027       |
|      | Johnson elongated triangular bipyramid J14 ( $D_{3h}$ )   | 26.241       |
|      | Octagon ( $D_{8h}$ )                                      | 31.300       |
|      | Heptagonal pyramid ( $C_{7v}$ )                           | 24.024       |
| Eu16 | Hexagonal bipyramid ( $D_{6h}$ )                          | 14.897       |
|      | Cube ( $O_h$ )                                            | 9.923        |

|      |                                                         |              |
|------|---------------------------------------------------------|--------------|
|      | Square antiprism ( $D_{4d}$ )                           | 3.153        |
|      | <b>Triangular dodecahedron (<math>D_{2d}</math>)</b>    | <b>1.913</b> |
|      | Johnson gyrobifastigium J26 ( $D_{2d}$ )                | 11.352       |
|      | Johnson elongated triangular bipyramid J14 ( $D_{3h}$ ) | 24.555       |
|      | Octagon ( $D_{8h}$ )                                    | 29.685       |
|      | Heptagonal pyramid ( $C_{7v}$ )                         | 21.043       |
|      | Hexagonal bipyramid ( $D_{6h}$ )                        | 17.324       |
|      | Cube ( $O_h$ )                                          | 13.509       |
| Eu17 | Square antiprism ( $D_{4d}$ )                           | 3.753        |
|      | <b>Triangular dodecahedron (<math>D_{2d}</math>)</b>    | <b>3.158</b> |
|      | Johnson gyrobifastigium J26 ( $D_{2d}$ )                | 12.708       |
|      | Johnson elongated triangular bipyramid J14 ( $D_{3h}$ ) | 24.747       |
|      | Octagon ( $D_{8h}$ )                                    | 30.584       |
|      | Heptagonal pyramid ( $C_{7v}$ )                         | 23.112       |
|      | Hexagonal bipyramid ( $D_{6h}$ )                        | 16.199       |
|      | Cube ( $O_h$ )                                          | 11.833       |
| Eu18 | Square antiprism ( $D_{4d}$ )                           | 2.776        |
|      | <b>Triangular dodecahedron (<math>D_{2d}</math>)</b>    | <b>1.092</b> |
|      | Johnson gyrobifastigium J26 ( $D_{2d}$ )                | 11.650       |
|      | Johnson elongated triangular bipyramid J14 ( $D_{3h}$ ) | 26.977       |
|      | Octagon ( $D_{8h}$ )                                    | 30.678       |
|      | Heptagonal pyramid ( $C_{7v}$ )                         | 22.617       |
|      | Hexagonal bipyramid ( $D_{6h}$ )                        | 15.682       |
|      | Cube ( $O_h$ )                                          | 11.713       |
| Eu19 | Square antiprism ( $D_{4d}$ )                           | 3.196        |
|      | <b>Triangular dodecahedron (<math>D_{2d}</math>)</b>    | <b>1.064</b> |
|      | Johnson gyrobifastigium J26 ( $D_{2d}$ )                | 11.264       |
|      | Johnson elongated triangular bipyramid J14 ( $D_{3h}$ ) | 26.590       |
|      | Octagon ( $D_{8h}$ )                                    | 30.492       |
|      | Heptagonal pyramid ( $C_{7v}$ )                         | 23.104       |
|      | Hexagonal bipyramid ( $D_{6h}$ )                        | 14.786       |
|      | Cube ( $O_h$ )                                          | 12.875       |
| Eu20 | Square antiprism ( $D_{4d}$ )                           | 3.643        |
|      | <b>Triangular dodecahedron (<math>D_{2d}</math>)</b>    | <b>1.314</b> |
|      | Johnson gyrobifastigium J26 ( $D_{2d}$ )                | 9.673        |
|      | Johnson elongated triangular bipyramid J14 ( $D_{3h}$ ) | 27.150       |
|      | Octagon ( $D_{8h}$ )                                    | 30.433       |
|      | Heptagonal pyramid ( $C_{7v}$ )                         | 24.383       |
| Eu21 | Hexagonal bipyramid ( $D_{6h}$ )                        | 14.810       |
|      | Cube ( $O_h$ )                                          | 11.988       |

|      |                                                                |              |
|------|----------------------------------------------------------------|--------------|
|      | Square antiprism ( $D_{4d}$ )                                  | 2.938        |
|      | <b>Triangular dodecahedron (<math>D_{2d}</math>)</b>           | <b>2.068</b> |
|      | Johnson gyrobifastigium J26 ( $D_{2d}$ )                       | 9.541        |
|      | Johnson elongated triangular bipyramid J14 ( $D_{3h}$ )        | 25.971       |
|      | Enneagon ( $D_{9h}$ )                                          | 31.905       |
|      | Octagonal pyramid ( $C_{8v}$ )                                 | 22.003       |
|      | Hexagonal bipyramid ( $D_{7h}$ )                               | 19.833       |
|      | Johnson triangular cupola ( $C_{3v}$ )                         | 12.652       |
| Eu22 | Capped cube ( $C_{4v}$ )                                       | 10.286       |
|      | Spherical-relaxed capped cube ( $C_{4v}$ )                     | 9.286        |
|      | Capped square antiprism J10 ( $C_{4v}$ )                       | 1.813        |
|      | <b>Spherical capped square antiprism (<math>C_{4v}</math>)</b> | <b>1.294</b> |
|      | Tricapped trigonal prism J51 ( $D_{3h}$ )                      | 2.130        |

**Table S4.** Coordination Environment of Eu(III) ions in **1-Eu**.

| Eu(III) cations | Coordination environments of Eu(III) cations                                                                                                                                                | Eu(III) cations | Coordination environments of Eu(III) cations                                                                                                                                                                                       |
|-----------------|---------------------------------------------------------------------------------------------------------------------------------------------------------------------------------------------|-----------------|------------------------------------------------------------------------------------------------------------------------------------------------------------------------------------------------------------------------------------|
| Eu1             | eight O atoms from POT Bus;<br>one $\mu_3$ -O atom shared with Eu2<br>and Eu7                                                                                                               | Eu2             | four O atoms from POT Bus;<br>one $\mu_3$ -O atom shared with<br>{WO <sub>6</sub> }; one $\mu_2$ -O atom shared<br>with {WO <sub>4</sub> }; one $\mu_3$ -O atom<br>shared with Eu1 and Eu7; one<br>$\mu_2$ -O atom shared with Eu5 |
| Eu3             | eight O atoms from POT Bus;<br>one $\mu_3$ -O atom shared with Eu4<br>and Eu6                                                                                                               | Eu4             | four O atoms from POT Bus;<br>one $\mu_3$ -O atom shared with Eu3<br>and Eu6; two $\mu_3$ -O atoms<br>shared with {WO <sub>6</sub> }; one $\mu_2$ -O<br>atom shared with {WO <sub>4</sub> }                                        |
| Eu5             | six O atoms from POT Bus;<br>one $\mu_2$ -O atom shared with<br>Eu2; one $\mu_2$ -O atom shared<br>with {WO <sub>6</sub> }                                                                  | Eu6             | four O atoms from POT Bus;<br>one $\mu_3$ -O atom shared with<br>{WO <sub>6</sub> }; one $\mu_2$ -O atom shared<br>with {WO <sub>4</sub> }; one $\mu_3$ -O atom<br>shared with Eu3 and Eu4; one<br>$\mu_2$ -O atom shared with Eu8 |
| Eu7             | four O atoms from POT Bus;<br>one $\mu_3$ -O atom shared with Eu1<br>and Eu2; two $\mu_3$ -O atoms<br>shared with {WO <sub>6</sub> }; one $\mu_2$ -O<br>atom shared with {WO <sub>4</sub> } | Eu8             | six O atoms from POT Bus; one<br>$\mu_2$ -O atom shared with Eu2;<br>one $\mu_2$ -O atom shared with<br>{WO <sub>6</sub> }                                                                                                         |

**Table S5.** Coordination Environment of Eu(III) ions in **2-Eu**.

| Eu(III) cations | Coordination environments of Eu(III) cations                                                                                                                                                  | Eu(III) cations | Coordination environments of Eu(III) cations                                                                                                                                     |
|-----------------|-----------------------------------------------------------------------------------------------------------------------------------------------------------------------------------------------|-----------------|----------------------------------------------------------------------------------------------------------------------------------------------------------------------------------|
| Eu1             | four O atoms from POT Bus;<br>four $\mu_3$ -O atoms shared with $\{\text{SeO}_3^{2-}\}$                                                                                                       | Eu2             | six $\mu_3$ -O atoms shared with $\{\text{SeO}_3^{2-}\}$ ; three $\mu_2$ -O atoms shared with $\{\text{SeO}_3^{2-}\}$                                                            |
| Eu3             | five $\mu_3$ -O atoms shared with $\{\text{SeO}_3^{2-}\}$ ; one $\mu_3$ -O atom shared with $\{\text{SeO}_3^{2-}\}$ ; one $\mu_2$ -O atom shared with Eu15; two O atoms from water molecules. | Eu4             | four $\mu_3$ -O atoms shared with $\{\text{SeO}_3^{2-}\}$ ; three $\mu_3$ -O atoms shared with $\{\text{SeO}_3^{2-}\}$ ; one $\mu_2$ -O atom shared with $\{\text{SeO}_3^{2-}\}$ |
| Eu5             | six $\mu_3$ -O atoms shared with $\{\text{SeO}_3^{2-}\}$ ; three $\mu_2$ -O atoms shared with $\{\text{SeO}_3^{2-}\}$                                                                         | Eu6             | four O atoms from POT Bus; three $\mu_3$ -O atoms shared with $\{\text{SeO}_3^{2-}\}$ ; one $\mu_2$ -O atom shared with $\{\text{SeO}_3^{2-}\}$                                  |
| Eu7             | four $\mu_3$ -O atoms shared with $\{\text{SeO}_3^{2-}\}$ ; three $\mu_3$ -O atoms shared with $\{\text{SeO}_3^{2-}\}$ ; one $\mu_2$ -O atom shared with $\{\text{SeO}_3^{2-}\}$              | Eu8             | four O atoms from POT Bus; three $\mu_3$ -O atoms shared with $\{\text{SeO}_3^{2-}\}$ ; one $\mu_2$ -O atom shared with $\{\text{SeO}_3^{2-}\}$                                  |
| Eu9             | four O atoms from POT Bus; four $\mu_3$ -O atoms shared with $\{\text{SeO}_3^{2-}\}$                                                                                                          | Eu10            | four O atoms from POT Bus; four $\mu_3$ -O atoms shared with $\{\text{SeO}_3^{2-}\}$                                                                                             |
| Eu11            | four O atoms from POT Bus; four $\mu_3$ -O atoms shared with $\{\text{SeO}_3^{2-}\}$                                                                                                          | Eu12            | four O atoms from POT Bus; four $\mu_3$ -O atoms shared with $\{\text{SeO}_3^{2-}\}$                                                                                             |
| Eu13            | four O atoms from POT Bus; four $\mu_3$ -O atoms shared with $\{\text{SeO}_3^{2-}\}$                                                                                                          | Eu14            | six $\mu_3$ -O atoms shared with $\{\text{SeO}_3^{2-}\}$ ; three $\mu_2$ -O atoms shared with $\{\text{SeO}_3^{2-}\}$                                                            |
| Eu15            | six $\mu_3$ -O atoms shared with $\{\text{SeO}_3^{2-}\}$ ; one $\mu_2$ -O atom shared with Eu3; one O atom from water molecule.                                                               | Eu16            | four O atoms from POT Bus; four $\mu_3$ -O atoms shared with $\{\text{SeO}_3^{2-}\}$                                                                                             |
| Eu17            | four O atoms from POT Bus; four $\mu_3$ -O atoms shared with $\{\text{SeO}_3^{2-}\}$                                                                                                          | Eu18            | four O atoms from POT Bus; three $\mu_3$ -O atoms shared with $\{\text{SeO}_3^{2-}\}$ ; one $\mu_2$ -O atom shared with $\{\text{SeO}_3^{2-}\}$                                  |
| Eu19            | four O atoms from POT Bus; three $\mu_3$ -O atoms shared with $\{\text{SeO}_3^{2-}\}$ ; one $\mu_2$ -O atom                                                                                   | Eu20            | four O atoms from POT Bus; three $\mu_3$ -O atoms shared with $\{\text{SeO}_3^{2-}\}$ ; one $\mu_2$ -O atom shared                                                               |

|      | shared with {SeO <sub>3</sub> <sup>2-</sup> }                                                                                                                |      | with Eu21                                                                                                                                                    |
|------|--------------------------------------------------------------------------------------------------------------------------------------------------------------|------|--------------------------------------------------------------------------------------------------------------------------------------------------------------|
| Eu21 | four O atoms from POT Bus;<br>three μ <sub>3</sub> -O atoms shared with<br>{SeO <sub>3</sub> <sup>2-</sup> }; one μ <sub>2</sub> -O atom<br>shared with Eu22 | Eu22 | six μ <sub>3</sub> -O atoms shared with<br>{SeO <sub>3</sub> <sup>2-</sup> }; three μ <sub>2</sub> -O atoms<br>shared with {SeO <sub>3</sub> <sup>2-</sup> } |

**Table S6.** Hydrogen bond lengths (Å) and angles(°) of compound **1-Eu**.

| D—H···A                                      | d(D—H) | d(H···A) | d(D—A)     | Ang(D—H···A) <sup>o</sup> | Symmetry codes of A |
|----------------------------------------------|--------|----------|------------|---------------------------|---------------------|
| O <sub>d</sub> 100-H100B···O <sub>b</sub> 22 | 0.850  | 2.295    | 2.9003(8)  | 126.926                   | 3/2-x, 3/2-y, 1-z   |
| O <sub>d</sub> 17-H17B···O <sub>b</sub> 121  | 0.850  | 2.890    | 3.2816(3)  | 110.148                   | 1-x, 1-y, 1-z       |
| O <sub>d</sub> 17-H17A···O <sub>d</sub> 104  | 0.850  | 2.922    | 3.2486(3)  | 105.076                   | 1-x, 1-y, 1-z       |
| C4-H4C···O <sub>c</sub> 15                   | 0.960  | 1.845    | 2.7540(12) | 156.867                   | x, y, z             |
| C2-H2B···O <sub>b</sub> 63                   | 0.960  | 1.909    | 2.8536(2)  | 167.523                   | x, y, z             |
| C2-H2C···O <sub>b</sub> 145                  | 0.960  | 1.768    | 2.6666(2)  | 154.494                   | x, y, z             |
| Ow8-Hw8A···O <sub>b</sub> 95                 | 0.850  | 2.015    | 2.8645(2)  | 180.000                   | x, y, z             |
| Ow1-Hw1B···O <sub>b</sub> 122                | 0.850  | 1.938    | 2.7803(2)  | 170.479                   | x, y, z             |
| Ow3-Hw3B···O <sub>d</sub> 139                | 0.850  | 2.168    | 2.8080(2)  | 131.931                   | 3/2-x, 1/2+y, 3/2-z |
| Ow7-Hw7A···O <sub>c</sub> 50                 | 0.850  | 1.846    | 2.6964(2)  | 180.000                   | x, y, z             |
| Ow8-Hw8A···O <sub>c</sub> 168                | 0.850  | 2.500    | 2.8723(2)  | 108.319                   | x, y, z             |
| Ow4-Hw4A···O <sub>c</sub> 40                 | 0.850  | 2.047    | 2.8972(2)  | 180.000                   | x, 2-y, 1/2+z       |
| Ow10-Hw10B···O <sub>d</sub> 55               | 0.850  | 3.302    | 3.3770(6)  | 90.766                    | 1-x, 2-y, 1-z       |
| Ow10-Hw10B···O <sub>c</sub> 120              | 0.850  | 2.105    | 2.880(2)   | 180.000                   | 1-x, 2-y, 1-z       |

O<sub>d</sub> = terminal oxygen, O<sub>b</sub> = bridging oxygen of two octahedra with common vertices, O<sub>c</sub> = bridging oxygen of two octahedra with common edges.

**Table S7.** Hydrogen bond lengths (Å) and angles(°) of compound **2-Eu**.

| D—H···A                         | d(D—H) | d(H···A) | d(D—A)    | Ang(D—H···A) <sup>o</sup> | Symmetry codes of A |
|---------------------------------|--------|----------|-----------|---------------------------|---------------------|
| Ow19-Hw19A···O <sub>b</sub> 125 | 0.850  | 1.913    | 2.7648(2) | 180.000                   | x, y, z             |
| Ow12-Hw12A···O <sub>c</sub> 182 | 0.850  | 1.997    | 2.8466(5) | 180.000                   | x, y, z             |
| Ow3-Hw3B···O <sub>b</sub> 7     | 0.850  | 2.011    | 2.8528(6) | 180.000                   | x, y, z             |
| Ow7-Hw7A···O <sub>c</sub> 367   | 0.850  | 2.039    | 2.8939(6) | 180.000                   | x, y, z             |
| Ow19-Hw19B···O <sub>d</sub> 263 | 0.850  | 2.304    | 2.9104(5) | 128.741                   | -1+x, y, z          |
| Ow19-Hw19B···O <sub>b</sub> 270 | 0.850  | 2.520    | 2.9206(2) | 109.775                   | x, y, z             |
| Ow25-Hw25B···O <sub>c</sub> 17  | 0.850  | 2.070    | 2.9191(5) | 178.284                   | x, y, z             |
| Ow3-Hw3B···O <sub>b</sub> 259   | 0.850  | 2.633    | 3.0087(5) | 107.888                   | x, y, z             |

|                                               |       |       |           |         |                      |
|-----------------------------------------------|-------|-------|-----------|---------|----------------------|
| Ow19-Hw19B...O <sub>b</sub> 292               | 0.850 | 2.595 | 3.0071(8) | 113.549 | x, y, z              |
| Ow17-Hw17B...O <sub>c</sub> 57                | 0.850 | 2.553 | 3.0106(2) | 126.934 | 2-x, 1-y, 1/2+z      |
| Ow10-Hw10B...O <sub>c</sub> 220               | 0.850 | 2.592 | 3.0218(2) | 112.559 | x, y, z              |
| Ow23-Hw23B...O <sub>c</sub> 242               | 0.850 | 2.219 | 3.0271(7) | 150.097 | x, y, z              |
| Ow26-Hw26B...O <sub>c</sub> 217               | 0.850 | 2.622 | 3.0329(8) | 110.820 | x, y, z              |
| Ow17-Hw17B...O <sub>d</sub> 166               | 0.850 | 2.234 | 3.0753(1) | 177.082 | x, y, z              |
| Ow17-Hw17A...O <sub>c</sub> 57                | 0.850 | 2.161 | 3.0106(2) | 180.000 | 2-x, 1-y, -1/2+z     |
| O <sub>d</sub> 310-H130B...O <sub>c</sub> 183 | 0.850 | 2.488 | 2.9740(7) | 116.765 | 3/2-x, -1/2+y, 1/2+z |
| O <sub>d</sub> 150-H150B...O <sub>c</sub> 125 | 0.850 | 2.355 | 2.9502(3) | 127.843 | 1-x, 1-y, 1/2+z      |
| Ow13-Hw13B...O <sub>d</sub> 150               | 0.850 | 2.030 | 2.9820(8) | 180.000 | 1-x, 1-y, 1/2+z      |
| Ow13-Hw13A...O <sub>c</sub> 121               | 0.850 | 2.088 | 2.9351(4) | 175.188 | x, y, z              |
| O343-H81A...Ow1                               | 0.850 | 2.092 | 2.9342(8) | 171.801 | x, y, z              |
| O81-H81B...O <sub>b</sub> 76                  | 0.850 | 2.068 | 2.8028(5) | 144.741 | x, y, z              |
| O331-H311A...O <sub>b</sub> 139               | 0.850 | 1.997 | 2.7959(5) | 156.413 | x, y, z              |

**Table S8.** Comparison of the PL lifetimes and quantum yield of various Eu(III)-incorporated POTs.

| Compound                                                                                                                                                                                                                                                                                                                                                                                                                                                                                                                              | PL lifetime ( $\tau^*$ ) | quantum yield (%) | Ref. |
|---------------------------------------------------------------------------------------------------------------------------------------------------------------------------------------------------------------------------------------------------------------------------------------------------------------------------------------------------------------------------------------------------------------------------------------------------------------------------------------------------------------------------------------|--------------------------|-------------------|------|
| [H <sub>2</sub> N(CH <sub>3</sub> ) <sub>2</sub> ] <sub>8</sub> Na <sub>2</sub> H <sub>4</sub> [Eu <sub>2</sub> W <sub>3</sub> BiO <sub>6</sub> (HPO <sub>3</sub> )(H <sub>2</sub> MA)(H <sub>2</sub> O) <sub>5</sub> ] <sub>2</sub> [B- $\alpha$ -SeW <sub>9</sub> O <sub>33</sub> ] <sub>4</sub> ·52H <sub>2</sub> O                                                                                                                                                                                                                | 391.45 $\mu$ s           | -                 | 1    |
| Na <sub>4</sub> [Eu <sub>4</sub> (H <sub>2</sub> O) <sub>2</sub> (H <sub>2</sub> PDBA) <sub>2</sub> (HPO <sub>3</sub> ) <sub>2</sub> W <sub>6</sub> O <sub>10</sub> ][B- $\alpha$ -TeW <sub>8</sub> O <sub>31</sub> ] <sub>4</sub> ·70H <sub>2</sub> O                                                                                                                                                                                                                                                                                | 749.51 $\mu$ s           | 8.47              | 2    |
| K <sub>6</sub> H <sub>36</sub> [{As <sub>2</sub> W <sub>19</sub> O <sub>68</sub> }] <sub>2</sub> {W <sub>5</sub> O <sub>19</sub> (OH)Eu <sub>5</sub> (Glu) <sub>2</sub> (H <sub>2</sub> O) <sub>15</sub> }{( $\alpha$ -AsW <sub>9</sub> O <sub>33</sub> ) <sub>2</sub> W <sub>4</sub> O <sub>10</sub> (Glu) <sub>2</sub> Eu <sub>4</sub> (H <sub>2</sub> O) <sub>17</sub> }] <sub>2</sub> ·90H <sub>2</sub> O                                                                                                                         | 232.00 $\mu$ s           | -                 | 3    |
| [H <sub>2</sub> N(CH <sub>3</sub> ) <sub>2</sub> ] <sub>14</sub> Na <sub>30</sub> H <sub>6</sub> [W <sub>4</sub> O <sub>10</sub> ][B- $\beta$ -BiW <sub>9</sub> O <sub>33</sub> ] <sub>2</sub> {[Bi <sub>5.35</sub> Sb <sub>0.65</sub> Eu <sub>3</sub> O <sub>9</sub> (H <sub>2</sub> O) <sub>9</sub> ][B- $\alpha$ -SbW <sub>9</sub> O <sub>33</sub> ] <sub>3</sub> }] <sub>2</sub> ·124H <sub>2</sub> O                                                                                                                             | 340.00 $\mu$ s           | -                 | 4    |
| H <sub>36</sub> Na <sub>6</sub> (H <sub>2</sub> O) <sub>6</sub> {[Eu <sub>20</sub> (OH) <sub>6</sub> (H <sub>2</sub> O) <sub>24</sub> (SO <sub>3</sub> ) <sub>3</sub> (SeO <sub>3</sub> ) <sub>9</sub> ][ $\beta$ (4,11)-GeW <sub>10</sub> O <sub>38</sub> ] <sub>3</sub> ][ $\beta$ (5,10)-GeW <sub>10</sub> O <sub>38</sub> ] <sub>3</sub> }]·61H <sub>2</sub> O                                                                                                                                                                    | 411.00 $\mu$ s           | 22.40             | 5    |
| H <sub>32</sub> [H <sub>2</sub> N(CH <sub>3</sub> ) <sub>2</sub> ] <sub>4</sub> [Na <sub>7</sub> (H <sub>2</sub> O) <sub>7</sub> ][K <sub>10</sub> (H <sub>2</sub> O) <sub>12</sub> ]{Eu <sub>4</sub> (HCOO) <sub>4</sub> [(W <sub>2</sub> O <sub>2</sub> )(HCOO)(B- $\alpha$ -SeW <sub>7</sub> O <sub>28</sub> ) <sub>2</sub> ][(SeO) <sub>4</sub> (W <sub>2</sub> O <sub>7</sub> ) <sub>4</sub> (B- $\alpha$ -SeW <sub>9</sub> O <sub>33</sub> ) <sub>4</sub> ]}·26H <sub>2</sub> O                                                 | 759.8 $\mu$ s            | -                 | 6    |
| H <sub>21</sub> [H <sub>2</sub> N(CH <sub>3</sub> ) <sub>2</sub> ] <sub>4</sub> [Na <sub>4</sub> (H <sub>2</sub> O) <sub>7</sub> ][K <sub>4</sub> (H <sub>2</sub> O) <sub>5</sub> ](EuSe <sub>2</sub> O <sub>2</sub> ){(EuO <sub>2</sub> )[(Eu(H <sub>2</sub> O) <sub>3</sub> )(WO <sub>2</sub> ) <sub>2</sub> (W <sub>2</sub> O <sub>5</sub> )(HCOO) <sub>2</sub> }] <sub>2</sub> {[B- $\alpha$ -SeW <sub>8</sub> O <sub>31</sub> ] <sub>2</sub> [B- $\alpha$ -SeW <sub>9</sub> O <sub>33</sub> ] <sub>4</sub> }]·24H <sub>2</sub> O | 722.8 $\mu$ s            | -                 | 6    |

|                                                                                                                                                                                                              |                 |              |                  |
|--------------------------------------------------------------------------------------------------------------------------------------------------------------------------------------------------------------|-----------------|--------------|------------------|
| H <sub>38</sub> Na <sub>10</sub> K <sub>14</sub> (TMEDA) <sub>8</sub> [Eu <sub>30</sub> Ge <sub>12</sub> W <sub>107</sub> O <sub>420</sub> (OH) <sub>2</sub> (H <sub>2</sub> O) <sub>14</sub> ]<br>·solvents | 625 μs          | 39.09        | 7                |
| <b>1-Eu</b>                                                                                                                                                                                                  | <b>481.4 μs</b> | <b>15.39</b> | <b>This work</b> |
| <b>2-Eu</b>                                                                                                                                                                                                  | <b>818.5 μs</b> | <b>47.34</b> | <b>This work</b> |

**Table S9** Summary of proton conductivity of POTs.

| Compounds                                                                                                                                                                                                                                                                  | Conductivity <sub>max</sub><br>(S·cm <sup>-1</sup> ) | E <sub>a</sub><br>(eV) | Ref              |
|----------------------------------------------------------------------------------------------------------------------------------------------------------------------------------------------------------------------------------------------------------------------------|------------------------------------------------------|------------------------|------------------|
| Cs <sub>5</sub> [Tb(H <sub>2</sub> O) <sub>4</sub> P <sub>4</sub> W <sub>6</sub> (O <sub>2</sub> ) <sub>6</sub> (OH) <sub>4</sub> O <sub>24</sub> ]·nH <sub>2</sub> O                                                                                                      | 2.78×10 <sup>-3</sup> (65 °C,<br>95%RH)              | 0.49                   | 8                |
| [Zn(NH <sub>2</sub> trz) <sub>3</sub> ][NH <sub>3</sub> trz] <sub>2</sub> [SiW <sub>12</sub> O <sub>40</sub> ]·10H <sub>2</sub> O                                                                                                                                          | 5.6×10 <sup>-3</sup> (80 °C,<br>98%RH)               | 0.28                   | 9                |
| Na <sub>2</sub> (H <sub>3</sub> O) <sub>6</sub> [{Ru <sup>IV</sup> (bpy)} <sub>2</sub> {WO <sub>2</sub> (C <sub>2</sub> O <sub>4</sub> ) <sub>2</sub> {GeW <sub>11</sub> O <sub>39</sub> } <sub>2</sub> ]}·27H <sub>2</sub> O                                              | 1.24×10 <sup>-2</sup> (80 °C,<br>90%RH)              | 0.24                   | 10               |
| H <sub>17</sub> (H <sub>2</sub> en) <sub>3</sub> [Sb <sup>III</sup> <sub>9</sub> Sb <sup>V</sup> Ce <sub>3</sub> O <sub>14</sub> (H <sub>2</sub> O) <sub>3</sub> ][(SbW <sub>9</sub> O <sub>33</sub> ) <sub>3</sub> (PW <sub>9</sub> O <sub>34</sub> )]·28H <sub>2</sub> O | 4.57×10 <sup>-4</sup> (85 °C,<br>98%RH)              | 0.34                   | 11               |
| H <sub>9</sub> [Ln <sub>9</sub> W <sub>8</sub> (μ <sub>4</sub> -O) <sub>12</sub> (μ <sub>2</sub> -O) <sub>24</sub> (H <sub>2</sub> O) <sub>24</sub> ](SiW <sub>12</sub> O <sub>40</sub> ) <sub>3</sub> ·60H <sub>2</sub> O                                                 | 4.75×10 <sup>-4</sup> (85 °C,<br>98%RH)              | 0.76                   | 12               |
| H <sub>38</sub> Na <sub>10</sub> K <sub>14</sub> (TMEDA) <sub>8</sub> [Eu <sub>30</sub> Ge <sub>12</sub> W <sub>107</sub> O <sub>420</sub> (OH) <sub>2</sub> (H <sub>2</sub> O) <sub>14</sub> ]·solvents                                                                   | 1.95×10 <sup>-2</sup> (85 °C,<br>98%RH)              | 0.32                   | 7                |
| <b>1-Eu</b>                                                                                                                                                                                                                                                                | <b>6.10×10<sup>-3</sup>(85 °C,<br/>98%RH)</b>        | <b>0.29</b>            | <b>This work</b> |
| <b>2-Eu</b>                                                                                                                                                                                                                                                                | <b>6.58×10<sup>-3</sup>(85 °C,<br/>98%RH)</b>        | <b>0.27</b>            | <b>This work</b> |

**Table S10** Summary of storage performance of POMs.

| Devices structure                                                                                                                                                                                                                                                                                                                                                                                                                                                           | ON/OFF                | Set<br>/Reset (V) | Endurance | Ref. |
|-----------------------------------------------------------------------------------------------------------------------------------------------------------------------------------------------------------------------------------------------------------------------------------------------------------------------------------------------------------------------------------------------------------------------------------------------------------------------------|-----------------------|-------------------|-----------|------|
| {[Co <sub>2</sub> (bpdo) <sub>4</sub> (H <sub>2</sub> O) <sub>6</sub> ](α-GeW <sub>12</sub> O <sub>40</sub> )}·4(H <sub>2</sub> O) <sub>n</sub>                                                                                                                                                                                                                                                                                                                             | 1.18×10 <sup>2</sup>  | 1.77/-2.10        | 100       | 13   |
| [Co(H <sub>2</sub> O) <sub>6</sub> ] <sub>2</sub> [Co <sub>3</sub> (bpdo) <sub>4</sub> (H <sub>2</sub> O) <sub>10</sub> ][Co <sub>4</sub> (H <sub>2</sub> O) <sub>2</sub> (<br>B-a-PW <sub>9</sub> O <sub>34</sub> ) <sub>2</sub> ] <sub>2</sub> bpdo·14H <sub>2</sub> O                                                                                                                                                                                                    | 27.3                  | -0.63/0.75        | 20        | 14   |
| (MV) <sub>2</sub> [Cu <sub>2</sub> I <sub>3</sub> ](MnMo <sub>6</sub> O <sub>18</sub> L <sub>2</sub> )·4CH <sub>3</sub> CN                                                                                                                                                                                                                                                                                                                                                  | 2.328×10 <sup>2</sup> | 0.97/-3.49        | 700       | 15   |
| H <sub>4</sub> [Na(H <sub>2</sub> O) <sub>5</sub> ] <sub>2</sub> [Co <sup>II</sup> (en) <sub>3</sub> ] <sub>2</sub> {[Co <sup>III</sup> (en)] <sub>2</sub> (Ta <sub>6</sub> O <sub>19</sub> ) <sub>2</sub> }·22H <sub>2</sub> O                                                                                                                                                                                                                                             | 1.43×10 <sup>3</sup>  | 3.79/-7.64        | 100       | 16   |
| Na <sub>10</sub> (H <sub>2</sub> O) <sub>36</sub> [Co <sub>2</sub> (phen) <sub>2</sub> (4,4'-bipy)(Nb <sub>6</sub> O <sub>19</sub> ) <sub>2</sub> ]·19H <sub>2</sub> O                                                                                                                                                                                                                                                                                                      | 1.18×10 <sup>3</sup>  | 1.12/7.00         | 200       | 17   |
| H <sub>32</sub> [H <sub>2</sub> N(CH <sub>3</sub> ) <sub>2</sub> ] <sub>4</sub> [Na <sub>7</sub> (H <sub>2</sub> O) <sub>7</sub> ][K <sub>10</sub> (H <sub>2</sub> O) <sub>12</sub> ]<br>{Eu <sub>4</sub> (HCOO) <sub>4</sub> [(W <sub>2</sub> O <sub>2</sub> )(HCOO)(B-α-<br>SeW <sub>7</sub> O <sub>28</sub> ) <sub>2</sub> ][(SeO) <sub>4</sub> (W <sub>2</sub> O <sub>7</sub> ) <sub>4</sub> (B-α-SeW <sub>9</sub> O <sub>33</sub> ) <sub>4</sub> ]}·26H <sub>2</sub> O | 1.03×10 <sup>3</sup>  | 1.22/-7.14        | 150       | 6    |

|                                                                                                                                                                                                                                                                                                                                                                                                                                                                                                                                         |                            |                   |            |                  |
|-----------------------------------------------------------------------------------------------------------------------------------------------------------------------------------------------------------------------------------------------------------------------------------------------------------------------------------------------------------------------------------------------------------------------------------------------------------------------------------------------------------------------------------------|----------------------------|-------------------|------------|------------------|
| H <sub>21</sub> [H <sub>2</sub> N(CH <sub>3</sub> ) <sub>2</sub> ] <sub>4</sub> [Na <sub>4</sub> (H <sub>2</sub> O) <sub>7</sub> ][K <sub>4</sub> (H <sub>2</sub> O) <sub>5</sub> ]<br>(EuSe <sub>2</sub> O <sub>2</sub> ) <sub>2</sub> {(EuO <sub>2</sub> )[(Eu(H <sub>2</sub> O) <sub>3</sub> )(WO <sub>2</sub> ) <sub>2</sub> (W <sub>2</sub> O <sub>5</sub> )(HCOO) <sub>2</sub> ] <sub>2</sub> {[B-<br>α-SeW <sub>8</sub> O <sub>31</sub> ] <sub>2</sub> [B-α-SeW <sub>9</sub> O <sub>33</sub> ] <sub>4</sub> }·24H <sub>2</sub> O | 3.67×10 <sup>3</sup>       | 0.94/-7.40        | 130        | 6                |
| <b>1-Eu</b>                                                                                                                                                                                                                                                                                                                                                                                                                                                                                                                             | <b>4.98×10<sup>3</sup></b> | <b>1.00/-</b>     | <b>105</b> | <b>This work</b> |
| <b>2-Eu</b>                                                                                                                                                                                                                                                                                                                                                                                                                                                                                                                             | <b>2.68×10<sup>4</sup></b> | <b>1.08/-7.28</b> | <b>125</b> | <b>This work</b> |

Table S11. Bond valence calculations of the W, Eu and Se atoms in **1-Eu** and **2-Eu**.

| <b>1-Eu</b> |      |         |       |      |         |
|-------------|------|---------|-------|------|---------|
| Atoms       | BVS  | Valence | Atoms | BVS  | Valence |
| W1          | 6.13 | +6      | W27   | 5.99 | +6      |
| W2          | 6.09 | +6      | W28   | 6.07 | +6      |
| W3          | 5.71 | +6      | W29   | 6.11 | +6      |
| W4          | 5.99 | +6      | W30   | 6.21 | +6      |
| W5          | 6.21 | +6      | W31   | 6.25 | +6      |
| W6          | 6.07 | +6      | W32   | 5.98 | +6      |
| W7          | 6.49 | +6      | W33   | 5.81 | +6      |
| W8          | 5.43 | +6      | W34   | 5.92 | +6      |
| W9          | 5.86 | +6      | W35   | 6.08 | +6      |
| W10         | 6.57 | +6      | W36   | 6.36 | +6      |
| W11         | 6.04 | +6      | W37   | 5.94 | +6      |
| W12         | 6.20 | +6      | W38   | 6.08 | +6      |
| W13         | 6.03 | +6      | W39   | 5.99 | +6      |
| W14         | 6.30 | +6      | W40   | 6.12 | +6      |
| W15         | 6.34 | +6      | W41   | 5.86 | +6      |
| W16         | 5.97 | +6      | W42   | 6.22 | +6      |
| W17         | 5.86 | +6      | W43   | 6.10 | +6      |
| W18         | 5.83 | +6      | Eu1   | 2.99 | +3      |
| W19         | 5.92 | +6      | Eu2   | 2.96 | +3      |
| W20         | 5.82 | +6      | Eu3   | 3.03 | +3      |
| W21         | 5.89 | +6      | Eu4   | 3.39 | +3      |
| W22         | 6.03 | +6      | Eu5   | 3.20 | +3      |
| W23         | 6.09 | +6      | Eu6   | 2.93 | +3      |
| W24         | 6.16 | +6      | Eu7   | 3.09 | +3      |
| W25         | 5.86 | +6      | Eu8   | 3.25 | +3      |
| W26         | 6.25 | +6      |       |      |         |
| <b>2-Eu</b> |      |         |       |      |         |
| Atoms       | BVS  | Valence | Atoms | BVS  | Valence |
| W1          | 5.71 | +6      | W69   | 6.27 | +6      |
| W2          | 6.21 | +6      | W70   | 5.73 | +6      |
| W3          | 6.61 | +6      | W71   | 5.93 | +6      |
| W4          | 6.85 | +6      | W72   | 6.32 | +6      |
| W5          | 6.26 | +6      | W73   | 6.21 | +6      |

---

|     |      |    |      |      |    |
|-----|------|----|------|------|----|
| W6  | 6.41 | +6 | W74  | 6.06 | +6 |
| W7  | 6.14 | +6 | W75  | 5.70 | +6 |
| W8  | 5.80 | +6 | W76  | 5.96 | +6 |
| W9  | 6.41 | +6 | W77  | 6.12 | +6 |
| W10 | 6.16 | +6 | W78  | 5.82 | +6 |
| W11 | 3.90 | +6 | W79  | 6.76 | +6 |
| W12 | 5.84 | +6 | W80  | 5.98 | +6 |
| W13 | 6.13 | +6 | W81  | 6.34 | +6 |
| W14 | 6.69 | +6 | W82  | 6.34 | +6 |
| W15 | 5.81 | +6 | W83  | 5.77 | +6 |
| W16 | 5.75 | +6 | W84  | 5.70 | +6 |
| W17 | 6.17 | +6 | W85  | 5.87 | +6 |
| W18 | 5.59 | +6 | W86  | 6.11 | +6 |
| W19 | 5.71 | +6 | W87  | 5.93 | +6 |
| W20 | 5.94 | +6 | W88  | 6.02 | +6 |
| W21 | 6.37 | +6 | W89  | 6.11 | +6 |
| W22 | 6.81 | +6 | Se1  | 4.17 | +4 |
| W23 | 6.04 | +6 | Se2  | 3.66 | +4 |
| W24 | 5.90 | +6 | Se3  | 4.14 | +4 |
| W25 | 6.13 | +6 | Se4  | 3.87 | +4 |
| W26 | 6.20 | +6 | Se5  | 4.04 | +4 |
| W27 | 6.29 | +6 | Se6  | 4.17 | +4 |
| W28 | 5.88 | +6 | Se7  | 3.98 | +4 |
| W29 | 6.40 | +6 | Se8  | 4.23 | +4 |
| W30 | 6.82 | +6 | Se9  | 3.79 | +4 |
| W31 | 6.14 | +6 | Se10 | 3.94 | +4 |
| W32 | 5.95 | +6 | Se11 | 4.64 | +4 |
| W33 | 6.33 | +6 | Se12 | 3.99 | +4 |
| W34 | 3.97 | +6 | Se13 | 4.17 | +4 |
| W35 | 5.89 | +6 | Se14 | 4.05 | +4 |
| W36 | 6.16 | +6 | Se15 | 4.29 | +4 |
| W37 | 6.14 | +6 | Se16 | 3.97 | +4 |
| W38 | 6.37 | +6 | Se17 | 4.18 | +4 |
| W39 | 5.78 | +6 | Se18 | 4.00 | +4 |
| W40 | 5.90 | +6 | Se19 | 4.04 | +4 |
| W41 | 6.02 | +6 | Se20 | 4.29 | +4 |
| W42 | 6.21 | +6 | Se21 | 3.86 | +4 |
| W43 | 5.61 | +6 | Se22 | 4.20 | +4 |
| W44 | 5.87 | +6 | Se23 | 3.90 | +4 |
| W45 | 6.10 | +6 | Se24 | 4.17 | +4 |
| W46 | 5.57 | +6 | Eu1  | 3.33 | +3 |
| W47 | 5.86 | +6 | Eu2  | 2.82 | +3 |
| W48 | 6.31 | +6 | Eu3  | 2.83 | +3 |
| W49 | 6.24 | +6 | Eu4  | 3.14 | +3 |

---

|     |      |    |      |      |    |
|-----|------|----|------|------|----|
| W50 | 5.97 | +6 | Eu5  | 2.76 | +3 |
| W51 | 5.89 | +6 | Eu6  | 2.97 | +3 |
| W52 | 5.83 | +6 | Eu7  | 3.37 | +3 |
| W53 | 5.76 | +6 | Eu8  | 3.17 | +3 |
| W54 | 5.92 | +6 | Eu9  | 3.20 | +3 |
| W55 | 6.01 | +6 | Eu10 | 3.55 | +3 |
| W56 | 5.95 | +6 | Eu11 | 3.20 | +3 |
| W57 | 6.02 | +6 | Eu12 | 3.24 | +3 |
| W58 | 5.80 | +6 | Eu13 | 3.15 | +3 |
| W59 | 5.81 | +6 | Eu14 | 2.71 | +3 |
| W60 | 6.00 | +6 | Eu15 | 2.77 | +3 |
| W61 | 5.76 | +6 | Eu16 | 3.24 | +3 |
| W62 | 6.34 | +6 | Eu17 | 3.30 | +3 |
| W63 | 6.01 | +6 | Eu18 | 3.00 | +3 |
| W64 | 6.46 | +6 | Eu19 | 3.27 | +3 |
| W65 | 6.15 | +6 | Eu20 | 3.25 | +3 |
| W66 | 7.32 | +6 | Eu21 | 3.06 | +3 |
| W67 | 5.96 | +6 | Eu22 | 2.89 | +3 |
| W68 | 5.96 | +6 |      |      |    |

Table S12. Selected bond lengths (Å) for compound **1-Eu** and **2-Eu**.

| <b>1-Eu</b> |         |          |         |
|-------------|---------|----------|---------|
| W1-O24      | 1.90(3) | W23-O42  | 1.89(3) |
| W1-O32      | 1.87(3) | W23-O44  | 1.85(3) |
| W1-O66      | 2.27(3) | W23-O72  | 1.72(3) |
| W1-O90      | 2.23(3) | W23-O130 | 2.36(3) |
| W1-O113     | 1.72(3) | W23-O146 | 1.91(3) |
| W1-O138     | 1.73(3) | W23-O149 | 1.91(3) |
| W2-O53      | 1.99(3) | W24-O70  | 1.87(3) |
| W2-O64      | 1.75(3) | W24-O86  | 1.88(3) |
| W2-O81      | 2.26(3) | W24-O98  | 1.88(3) |
| W2-O93      | 1.83(3) | W24-O109 | 1.95(3) |
| W2-O101     | 1.77(3) | W24-O111 | 2.39(3) |
| W2-O120     | 2.01(3) | W24-O143 | 1.69(3) |
| W3-O49      | 1.78(3) | W25-O75  | 2.26(3) |
| W3-O66      | 1.80(3) | W25-O77  | 1.81(3) |
| W3-O88      | 1.74(3) | W25-O95  | 1.91(3) |
| W3-O125     | 1.77(3) | W25-O101 | 2.13(3) |
| W4-O23      | 2.29(3) | W25-O102 | 1.97(3) |
| W4-O62      | 1.88(3) | W25-O170 | 1.68(3) |
| W4-O79      | 1.74(3) | W26-O6   | 1.92(3) |
| W4-O104     | 1.75(3) | W26-O26  | 1.68(3) |
| W4-O121     | 1.95(3) | W26-O27  | 1.89(3) |
| W4-O155     | 2.08(3) | W26-O84  | 2.33(3) |

---

|          |         |          |         |
|----------|---------|----------|---------|
| W5-O30   | 2.21(3) | W26-O91  | 1.86(3) |
| W5-O129  | 1.86(3) | W26-O165 | 1.91(3) |
| W5-O136  | 1.82(3) | W27-O63  | 2.08(3) |
| W5-O144  | 1.73(3) | W27-O67  | 1.91(3) |
| W5-O160  | 1.96(3) | W27-O86  | 1.95(3) |
| W5-O85   | 1.93(4) | W27-O92  | 1.72(3) |
| W6-O9    | 1.92(3) | W27-O97  | 2.26(3) |
| W6-O51   | 1.86(3) | W27-O122 | 1.76(3) |
| W6-O94   | 1.89(3) | W28-O40  | 1.82(3) |
| W6-O100  | 1.74(3) | W28-O69  | 1.92(3) |
| W6-O103  | 2.26(3) | W28-O105 | 1.70(3) |
| W6-O154  | 1.90(3) | W28-O110 | 1.95(3) |
| W7-O13   | 1.86(3) | W28-O114 | 2.31(3) |
| W7-O25   | 2.33(3) | W28-O165 | 1.94(3) |
| W7-O45   | 1.67(3) | W29-O42  | 1.93(3) |
| W7-O57   | 1.91(3) | W29-O75  | 2.20(3) |
| W7-O135  | 1.99(3) | W29-O78  | 1.76(3) |
| W8-O1    | 2.14(3) | W29-O102 | 1.91(3) |
| W8-O8    | 1.78(2) | W29-O112 | 1.71(3) |
| W8-O20   | 1.88(3) | W29-O127 | 2.10(3) |
| W8-O31   | 1.78(3) | W30-O5   | 1.92(3) |
| W8-O98   | 2.04(3) | W30-O6   | 1.96(3) |
| W8-O111  | 2.29(3) | W30-O59  | 1.83(3) |
| W9-O18   | 1.87(3) | W30-O84  | 2.25(3) |
| W9-O25   | 2.36(3) | W30-O139 | 1.74(3) |
| W9-O34   | 1.78(3) | W30-O161 | 1.83(3) |
| W9-O48   | 1.87(3) | W31-O15  | 1.91(3) |
| W9-O62   | 1.96(3) | W31-O21  | 1.97(3) |
| W9-O135  | 1.86(3) | W31-O107 | 1.68(3) |
| W10-O7   | 1.84(3) | W31-O130 | 2.33(3) |
| W10-O30  | 2.28(3) | W31-O149 | 1.87(3) |
| W10-O57  | 1.86(3) | W31-O173 | 1.84(3) |
| W10-O60  | 1.75(3) | W32-O11  | 2.01(3) |
| W10-O160 | 1.87(3) | W32-O74  | 1.79(3) |
| W10-O171 | 1.81(4) | W32-O89  | 1.91(3) |
| W11-O51  | 1.96(3) | W32-O154 | 1.94(3) |
| W11-O63  | 1.83(3) | W32-O167 | 1.74(3) |
| W11-O70  | 1.94(3) | W32-O174 | 2.22(3) |
| W11-O96  | 1.92(3) | W33-O21  | 2.02(3) |
| W11-O103 | 2.28(3) | W33-O56  | 1.89(3) |
| W11-O124 | 1.70(3) | W33-O61  | 2.28(3) |
| W12-O19  | 1.74(3) | W33-O71  | 1.77(3) |
| W12-O40  | 2.10(3) | W33-O162 | 1.95(3) |
| W12-O68  | 1.76(3) | W33-O164 | 1.79(3) |

---

---

|          |         |          |         |
|----------|---------|----------|---------|
| W12-O83  | 2.05(3) | W34-O7   | 2.04(3) |
| W12-O114 | 2.29(3) | W34-O13  | 1.94(3) |
| W12-O119 | 1.74(3) | W34-O16  | 1.79(3) |
| W13-O94  | 2.00(3) | W34-O52  | 1.93(3) |
| W13-O96  | 1.98(3) | W34-O108 | 1.72(3) |
| W13-O99  | 1.81(3) | W34-O163 | 2.25(3) |
| W13-O103 | 2.31(3) | W35-O35  | 1.73(3) |
| W13-O128 | 1.73(3) | W35-O67  | 1.92(3) |
| W13-O156 | 1.83(3) | W35-O97  | 2.24(3) |
| W14-O44  | 1.96(3) | W35-O99  | 2.06(3) |
| W14-O53  | 1.87(3) | W35-O142 | 1.79(3) |
| W14-O81  | 2.29(3) | W35-O153 | 1.97(3) |
| W14-O127 | 1.80(3) | W36-O18  | 2.07(3) |
| W14-O137 | 1.67(3) | W36-O25  | 2.28(3) |
| W14-O169 | 1.99(3) | W36-O36  | 1.76(3) |
| W15-O55  | 1.72(3) | W36-O151 | 1.75(3) |
| W15-O81  | 2.30(3) | W36-O158 | 2.12(3) |
| W15-O120 | 1.86(3) | W36-O172 | 1.80(3) |
| W15-O162 | 1.91(3) | W37-O39  | 1.70(3) |
| W15-O169 | 1.79(3) | W37-O50  | 1.79(3) |
| W15-O173 | 1.95(3) | W37-O89  | 1.98(3) |
| W16-O15  | 2.18(3) | W37-O153 | 1.87(3) |
| W16-O28  | 1.86(3) | W37-O156 | 2.07(3) |
| W16-O106 | 1.71(3) | W37-O174 | 2.24(3) |
| W16-O130 | 2.29(3) | W38-O23  | 2.17(3) |
| W16-O134 | 1.75(3) | W38-O121 | 1.95(3) |
| W16-O146 | 1.98(3) | W38-O131 | 1.69(3) |
| W17-O27  | 2.01(3) | W38-O136 | 2.06(3) |
| W17-O29  | 1.81(3) | W38-O148 | 1.77(3) |
| W17-O59  | 2.05(3) | W38-O166 | 1.92(3) |
| W17-O65  | 1.82(3) | W39-O2   | 2.26(3) |
| W17-O84  | 2.31(3) | W39-O22  | 1.92(3) |
| W17-O123 | 1.74(3) | W39-O80  | 1.93(3) |
| W18-O14  | 1.73(3) | W39-O118 | 1.79(3) |
| W18-O90  | 1.84(3) | W39-O132 | 1.71(3) |
| W18-O117 | 1.79(3) | W39-O161 | 2.05(3) |
| W18-O145 | 1.71(3) | W40-O46  | 2.28(3) |
| W19-O52  | 1.93(3) | W40-O47  | 1.72(3) |
| W19-O129 | 2.05(3) | W40-O69  | 1.92(3) |
| W19-O133 | 1.75(3) | W40-O91  | 2.01(3) |
| W19-O140 | 1.77(3) | W40-O115 | 1.76(3) |
| W19-O163 | 2.26(3) | W40-O168 | 1.93(3) |
| W19-O166 | 1.91(3) | W41-O2   | 2.27(3) |
| W20-O1   | 1.89(2) | W41-O3   | 1.75(3) |

---

---

|          |         |          |         |
|----------|---------|----------|---------|
| W20-O9   | 1.90(3) | W41-O22  | 1.96(3) |
| W20-O11  | 1.96(3) | W41-O29  | 2.07(3) |
| W20-O109 | 1.90(3) | W41-O33  | 1.77(3) |
| W20-O111 | 2.34(3) | W41-O116 | 1.89(3) |
| W20-O159 | 1.73(3) | W42-O17  | 1.76(3) |
| W21-O56  | 1.96(3) | W42-O30  | 2.38(3) |
| W21-O61  | 2.21(3) | W42-O48  | 1.94(3) |
| W21-O73  | 1.74(3) | W42-O155 | 1.81(3) |
| W21-O93  | 2.06(3) | W42-O171 | 2.01(3) |
| W21-O95  | 1.94(3) | W42-O85  | 1.92(4) |
| W21-O157 | 1.76(3) | W43-O5   | 1.89(3) |
| W22-O4   | 1.68(3) | W43-O80  | 1.93(3) |
| W22-O46  | 2.25(3) | W43-O83  | 1.85(3) |
| W22-O65  | 2.11(3) | W43-O110 | 1.91(3) |
| W22-O116 | 1.97(3) | W43-O114 | 2.34(3) |
| W22-O152 | 1.75(3) | W43-O141 | 1.71(3) |
| W22-O168 | 1.95(3) | Eu5-O8   | 2.32(3) |
| Eu1-O1   | 2.63(3) | Eu5-O36  | 2.30(3) |
| Eu1-O2   | 2.94(3) | Eu5-O97  | 3.00(3) |
| Eu1-O11  | 2.51(3) | Eu5-O106 | 2.47(3) |
| Eu1-O20  | 2.37(3) | Eu5-O113 | 2.41(3) |
| Eu1-O33  | 2.36(3) | Eu5-O122 | 2.42(3) |
| Eu1-O58  | 2.35(3) | Eu5-O126 | 2.31(3) |
| Eu1-O68  | 2.34(3) | Eu5-O142 | 2.41(3) |
| Eu1-O74  | 2.62(3) | Eu6-O12  | 2.59(3) |
| Eu1-O118 | 2.34(3) | Eu6-O24  | 2.37(3) |
| Eu2-O14  | 2.41(3) | Eu6-O28  | 2.42(3) |
| Eu2-O20  | 2.41(3) | Eu6-O54  | 2.30(3) |
| Eu2-O32  | 2.37(3) | Eu6-O61  | 3.12(3) |
| Eu2-O50  | 2.44(3) | Eu6-O73  | 2.44(3) |
| Eu2-O58  | 2.60(3) | Eu6-O125 | 2.40(3) |
| Eu2-O74  | 2.36(3) | Eu6-O164 | 2.36(3) |
| Eu2-O126 | 2.29(3) | Eu7-O32  | 2.45(3) |
| Eu2-O174 | 3.02(3) | Eu7-O46  | 2.86(3) |
| Eu3-O12  | 2.39(3) | Eu7-O58  | 2.36(3) |
| Eu3-O15  | 2.56(3) | Eu7-O66  | 2.44(3) |
| Eu3-O21  | 2.46(3) | Eu7-O115 | 2.37(3) |
| Eu3-O28  | 2.38(3) | Eu7-O117 | 2.34(3) |
| Eu3-O79  | 2.39(3) | Eu7-O119 | 2.32(3) |
| Eu3-O148 | 2.37(3) | Eu7-O152 | 2.48(3) |
| Eu3-O151 | 2.36(3) | Eu8-O19  | 2.37(3) |
| Eu3-O164 | 2.64(3) | Eu8-O31  | 2.41(3) |
| Eu4-O12  | 2.31(3) | Eu8-O54  | 2.26(3) |
| Eu4-O16  | 2.35(3) | Eu8-O75  | 3.08(3) |

---

|          |         |          |         |
|----------|---------|----------|---------|
| Eu4-O24  | 2.42(3) | Eu8-O77  | 2.38(3) |
| Eu4-O49  | 2.40(3) | Eu8-O78  | 2.43(3) |
| Eu4-O90  | 2.36(3) | Eu8-O134 | 2.36(3) |
| Eu4-O140 | 2.37(3) | Eu8-O138 | 2.37(3) |
| Eu4-O163 | 2.88(3) |          |         |
| Eu4-O172 | 2.29(3) |          |         |

**2-Eu**

|         |         |          |         |
|---------|---------|----------|---------|
| W1-O127 | 2.05(4) | W46-O109 | 1.81(5) |
| W1-O197 | 1.82(4) | W46-O129 | 2.01(4) |
| W1-O219 | 1.80(4) | W46-O255 | 1.98(4) |
| W1-O222 | 2.36(4) | W46-O256 | 2.42(4) |
| W1-O308 | 1.73(4) | W46-O276 | 1.84(4) |
| W1-O366 | 2.11(4) | W46-O364 | 1.91(4) |
| W2-O97  | 2.00(4) | W47-O100 | 1.96(5) |
| W2-O193 | 1.76(4) | W47-O104 | 1.82(4) |
| W2-O227 | 1.91(4) | W47-O120 | 1.95(4) |
| W2-O318 | 2.05(4) | W47-O154 | 1.97(5) |
| W2-O332 | 1.66(5) | W47-O166 | 1.70(4) |
| W2-O374 | 2.27(4) | W47-O176 | 2.36(4) |
| W3-O4   | 2.40(4) | W48-O32  | 2.07(4) |
| W3-O12  | 1.91(4) | W48-O36  | 2.26(4) |
| W3-O14  | 1.69(4) | W48-O44  | 1.91(4) |
| W3-O22  | 1.76(4) | W48-O50  | 1.73(4) |
| W3-O30  | 1.91(4) | W48-O64  | 1.95(4) |
| W3-O393 | 1.86(4) | W48-O86  | 1.68(4) |
| W4-O116 | 1.52(6) | W49-O255 | 1.87(4) |
| W4-O142 | 2.23(5) | W49-O259 | 1.95(4) |
| W4-O151 | 1.76(6) | W49-O291 | 1.86(4) |
| W4-O190 | 2.15(6) | W49-O310 | 1.68(4) |
| W4-O367 | 1.96(5) | W49-O352 | 2.43(4) |
| W4-O395 | 1.88(5) | W49-O370 | 1.88(5) |
| W5-O107 | 1.92(4) | W50-O29  | 1.96(4) |
| W5-O223 | 1.78(4) | W50-O133 | 1.84(4) |
| W5-O257 | 1.83(4) | W50-O272 | 1.94(4) |
| W5-O280 | 2.42(4) | W50-O352 | 2.26(4) |
| W5-O283 | 1.95(4) | W50-O370 | 2.01(4) |
| W5-O326 | 1.74(4) | W50-O392 | 1.67(4) |
| W6-O15  | 1.73(4) | W51-O92  | 1.85(4) |
| W6-O33  | 1.87(4) | W51-O106 | 1.88(4) |
| W6-O287 | 2.46(4) | W51-O124 | 2.31(4) |
| W6-O296 | 1.73(4) | W51-O144 | 1.83(4) |
| W6-O362 | 1.90(4) | W51-O206 | 1.97(5) |
| W6-O376 | 1.95(4) | W51-O216 | 1.92(5) |
| W7-O98  | 1.95(4) | W52-O51  | 1.77(4) |

---

|          |         |          |         |
|----------|---------|----------|---------|
| W7-O124  | 2.30(5) | W52-O226 | 2.31(4) |
| W7-O128  | 1.67(5) | W52-O246 | 2.00(4) |
| W7-O140  | 2.06(4) | W52-O321 | 1.91(4) |
| W7-O180  | 1.76(4) | W52-O345 | 1.95(4) |
| W7-O206  | 1.94(4) | W52-O380 | 1.76(4) |
| W8-O115  | 1.77(4) | W53-O3   | 2.07(7) |
| W8-O145  | 1.76(4) | W53-O96  | 2.31(5) |
| W8-O195  | 2.08(4) | W53-O108 | 2.03(5) |
| W8-O231  | 2.12(4) | W53-O188 | 1.90(5) |
| W8-O271  | 2.29(4) | W53-O192 | 1.73(5) |
| W8-O336  | 1.79(4) | W53-O218 | 1.75(5) |
| W9-O13   | 2.02(4) | W54-O234 | 1.89(5) |
| W9-O95   | 1.97(4) | W54-O289 | 1.85(5) |
| W9-O221  | 1.73(4) | W54-O294 | 1.67(4) |
| W9-O302  | 1.90(4) | W54-O318 | 1.86(4) |
| W9-O346  | 1.67(4) | W54-O356 | 1.94(5) |
| W9-O368  | 2.29(4) | W54-O374 | 2.44(4) |
| W10-O91  | 1.78(5) | W55-O106 | 1.99(4) |
| W10-O232 | 2.39(4) | W55-O122 | 1.64(4) |
| W10-O243 | 1.64(5) | W55-O130 | 2.15(5) |
| W10-O275 | 2.04(5) | W55-O154 | 1.96(4) |
| W10-O356 | 1.95(5) | W55-O176 | 2.32(5) |
| W10-O365 | 1.67(5) | W55-O184 | 1.85(4) |
| W11-O126 | 2.45(5) | W56-O127 | 1.86(4) |
| W11-O174 | 1.76(5) | W56-O241 | 1.89(4) |
| W11-O183 | 1.94(5) | W56-O242 | 1.93(4) |
| W11-O196 | 1.81(5) | W56-O274 | 1.75(4) |
| W12-O56  | 2.04(4) | W56-O330 | 1.95(4) |
| W12-O68  | 2.25(4) | W56-O340 | 2.30(4) |
| W12-O72  | 1.81(4) | W57-O65  | 1.76(5) |
| W12-O76  | 1.85(4) | W57-O103 | 2.30(4) |
| W12-O82  | 1.73(4) | W57-O201 | 2.02(4) |
| W12-O88  | 2.03(4) | W57-O249 | 1.93(5) |
| W13-O57  | 1.94(4) | W57-O267 | 1.83(4) |
| W13-O117 | 1.87(4) | W57-O269 | 1.93(5) |
| W13-O143 | 1.98(4) | W58-O126 | 2.37(5) |
| W13-O217 | 1.85(4) | W58-O136 | 1.69(5) |
| W13-O290 | 2.18(4) | W58-O170 | 1.79(5) |
| W13-O293 | 1.71(4) | W58-O194 | 1.90(5) |
| W14-O91  | 1.97(5) | W58-O196 | 2.00(5) |
| W14-O103 | 2.37(4) | W58-O210 | 2.17(5) |
| W14-O135 | 1.72(5) | W59-O73  | 1.82(4) |
| W14-O201 | 1.79(5) | W59-O189 | 1.91(5) |
| W14-O234 | 1.95(5) | W59-O232 | 2.24(4) |

---

---

|          |         |          |         |
|----------|---------|----------|---------|
| W14-O273 | 1.71(5) | W59-O269 | 1.92(5) |
| W15-O6   | 1.87(4) | W59-O359 | 1.69(5) |
| W15-O8   | 2.28(4) | W59-O365 | 2.04(4) |
| W15-O16  | 2.02(4) | W60-O55  | 1.75(4) |
| W15-O44  | 1.96(4) | W60-O57  | 1.96(4) |
| W15-O54  | 1.82(4) | W60-O99  | 1.64(4) |
| W15-O84  | 1.75(4) | W60-O137 | 2.00(4) |
| W16-O217 | 2.04(4) | W60-O286 | 1.90(4) |
| W16-O238 | 2.05(4) | W60-O290 | 2.29(4) |
| W16-O248 | 1.76(4) | W61-O132 | 2.46(4) |
| W16-O265 | 1.77(4) | W61-O148 | 1.83(4) |
| W16-O266 | 2.33(4) | W61-O162 | 1.94(5) |
| W16-O320 | 1.85(4) | W61-O168 | 1.64(5) |
| W17-O131 | 1.73(4) | W61-O172 | 1.89(5) |
| W17-O179 | 1.73(4) | W61-O220 | 2.00(5) |
| W17-O256 | 2.27(4) | W62-O94  | 1.68(5) |
| W17-O276 | 2.06(4) | W62-O96  | 2.32(6) |
| W17-O278 | 1.90(4) | W62-O158 | 1.91(5) |
| W17-O358 | 1.93(4) | W62-O188 | 1.71(6) |
| W18-O113 | 2.03(5) | W62-O194 | 1.92(6) |
| W18-O123 | 1.74(4) | W62-O212 | 2.12(6) |
| W18-O253 | 1.75(4) | W64-O61  | 1.96(4) |
| W18-O295 | 2.10(4) | W64-O205 | 1.70(4) |
| W18-O358 | 1.95(4) | W64-O228 | 1.67(4) |
| W18-O360 | 2.31(4) | W64-O256 | 2.30(4) |
| W19-O6   | 1.95(4) | W64-O278 | 1.93(4) |
| W19-O8   | 2.32(4) | W64-O364 | 2.03(4) |
| W19-O18  | 1.99(4) | W65-O211 | 1.88(4) |
| W19-O26  | 1.95(4) | W65-O226 | 2.40(4) |
| W19-O70  | 1.72(4) | W65-O240 | 1.92(4) |
| W19-O88  | 1.84(4) | W65-O246 | 1.92(4) |
| W20-O4   | 2.32(4) | W65-O279 | 1.71(4) |
| W20-O20  | 1.99(4) | W65-O312 | 1.83(4) |
| W20-O34  | 1.78(4) | W67-O126 | 1.97(5) |
| W20-O38  | 1.83(4) | W67-O183 | 1.49(6) |
| W20-O42  | 1.77(4) | W67-O210 | 1.88(6) |
| W20-O393 | 2.00(4) | W67-O361 | 2.07(5) |
| W21-O7   | 1.99(4) | W67-O369 | 2.08(5) |
| W21-O29  | 1.89(4) | W67-O395 | 1.87(6) |
| W21-O67  | 1.70(4) | W68-O27  | 1.74(4) |
| W21-O71  | 1.77(4) | W68-O39  | 1.76(4) |
| W21-O113 | 1.88(4) | W68-O121 | 1.91(4) |
| W21-O360 | 2.32(4) | W68-O250 | 1.93(4) |
| W22-O3   | 0.88(7) | W68-O281 | 2.30(4) |

---

---

|          |         |          |         |
|----------|---------|----------|---------|
| W22-O112 | 1.96(6) | W68-O306 | 2.05(4) |
| W22-O138 | 2.23(6) | W69-O25  | 1.95(4) |
| W22-O204 | 2.08(6) | W69-O203 | 1.67(4) |
| W23-O4   | 2.23(4) | W69-O233 | 1.76(4) |
| W23-O12  | 1.96(4) | W69-O250 | 1.92(4) |
| W23-O20  | 1.93(4) | W69-O257 | 2.04(4) |
| W23-O26  | 1.90(4) | W69-O280 | 2.26(4) |
| W23-O56  | 1.84(4) | W70-O95  | 1.89(4) |
| W23-O58  | 1.72(5) | W70-O117 | 2.00(4) |
| W24-O36  | 2.29(4) | W70-O238 | 1.87(4) |
| W24-O38  | 2.00(4) | W70-O263 | 1.68(4) |
| W24-O60  | 2.04(4) | W70-O264 | 2.04(4) |
| W24-O62  | 1.77(4) | W70-O368 | 2.34(4) |
| W24-O64  | 1.90(4) | W71-O124 | 2.38(4) |
| W24-O66  | 1.72(3) | W71-O140 | 1.73(5) |
| W25-O45  | 1.82(4) | W71-O148 | 2.03(5) |
| W25-O73  | 2.12(4) | W71-O178 | 1.96(5) |
| W25-O173 | 1.73(4) | W71-O208 | 1.76(5) |
| W25-O254 | 1.72(4) | W71-O216 | 1.90(5) |
| W25-O267 | 2.03(4) | W72-O53  | 1.67(4) |
| W25-O382 | 2.28(4) | W72-O226 | 2.33(4) |
| W26-O107 | 1.91(4) | W72-O241 | 1.95(4) |
| W26-O207 | 1.86(4) | W72-O312 | 1.95(4) |
| W26-O261 | 1.68(4) | W72-O345 | 1.89(4) |
| W26-O270 | 1.88(4) | W72-O366 | 1.80(4) |
| W26-O334 | 1.92(4) | W73-O120 | 1.91(5) |
| W26-O344 | 2.44(4) | W73-O130 | 1.62(5) |
| W27-O15  | 2.01(4) | W73-O150 | 1.71(5) |
| W27-O285 | 1.67(4) | W73-O162 | 1.93(5) |
| W27-O286 | 1.97(4) | W73-O176 | 2.35(4) |
| W27-O287 | 2.26(4) | W73-O178 | 1.85(5) |
| W27-O297 | 1.77(4) | W74-O69  | 1.70(4) |
| W27-O348 | 1.90(4) | W74-O97  | 1.91(4) |
| W28-O21  | 1.83(4) | W74-O236 | 1.74(4) |
| W28-O92  | 2.07(4) | W74-O289 | 2.08(4) |
| W28-O146 | 2.31(4) | W74-O316 | 1.96(4) |
| W28-O184 | 2.05(4) | W74-O374 | 2.34(4) |
| W28-O198 | 1.71(4) | W75-O134 | 1.76(5) |
| W28-O200 | 1.80(4) | W75-O142 | 2.08(5) |
| W29-O49  | 1.66(4) | W75-O156 | 2.38(5) |
| W29-O63  | 1.71(4) | W75-O160 | 1.78(5) |
| W29-O121 | 1.97(4) | W75-O323 | 1.77(5) |
| W29-O125 | 2.06(4) | W75-O369 | 2.16(5) |
| W29-O281 | 2.29(4) | W76-O101 | 1.84(4) |

---

---

|          |         |          |         |
|----------|---------|----------|---------|
| W29-O292 | 1.93(4) | W76-O141 | 1.72(4) |
| W30-O91  | 2.10(5) | W76-O211 | 1.95(4) |
| W30-O232 | 2.48(5) | W76-O251 | 1.92(4) |
| W30-O243 | 1.61(5) | W76-O300 | 2.45(4) |
| W30-O275 | 1.78(5) | W76-O354 | 1.88(4) |
| W30-O356 | 1.74(5) | W77-O98  | 1.90(4) |
| W30-O365 | 1.96(5) | W77-O102 | 1.76(4) |
| W31-O17  | 1.94(4) | W77-O132 | 2.26(5) |
| W31-O111 | 1.67(4) | W77-O152 | 1.71(5) |
| W31-O195 | 1.87(4) | W77-O182 | 1.94(4) |
| W31-O213 | 1.92(4) | W77-O220 | 2.06(4) |
| W31-O334 | 1.93(4) | W78-O3   | 2.14(7) |
| W31-O344 | 2.27(4) | W78-O112 | 2.02(6) |
| W32-O199 | 1.75(3) | W78-O138 | 1.66(5) |
| W32-O258 | 1.85(4) | W78-O151 | 2.24(5) |
| W32-O282 | 1.74(3) | W78-O204 | 1.85(5) |
| W32-O300 | 2.30(4) | W78-O367 | 1.67(6) |
| W32-O311 | 2.01(4) | W79-O116 | 2.05(6) |
| W32-O354 | 2.02(4) | W79-O142 | 1.76(5) |
| W33-O33  | 2.04(4) | W79-O151 | 2.32(5) |
| W33-O177 | 1.70(4) | W79-O190 | 1.60(6) |
| W33-O215 | 1.69(4) | W79-O367 | 2.04(5) |
| W33-O287 | 2.26(4) | W79-O395 | 1.80(5) |
| W33-O302 | 1.97(4) | W80-O35  | 1.72(4) |
| W33-O348 | 1.94(4) | W80-O61  | 1.90(4) |
| W34-O112 | 1.89(5) | W80-O272 | 1.94(4) |
| W34-O116 | 1.94(5) | W80-O284 | 1.79(4) |
| W34-O151 | 2.30(5) | W80-O291 | 2.05(4) |
| W34-O214 | 1.71(6) | W80-O352 | 2.25(4) |
| W35-O8   | 2.39(4) | W81-O3   | 1.74(7) |
| W35-O10  | 1.91(4) | W81-O112 | 1.87(6) |
| W35-O16  | 1.86(4) | W81-O138 | 1.80(5) |
| W35-O18  | 1.91(4) | W81-O151 | 2.34(5) |
| W35-O28  | 1.73(4) | W81-O204 | 1.77(5) |
| W35-O30  | 1.93(4) | W81-O367 | 2.08(6) |
| W36-O71  | 2.11(4) | W82-O126 | 2.38(5) |
| W36-O133 | 2.09(4) | W82-O183 | 2.00(5) |
| W36-O139 | 1.77(4) | W82-O210 | 1.76(5) |
| W36-O235 | 1.72(4) | W82-O361 | 1.62(5) |
| W36-O304 | 1.74(4) | W82-O369 | 1.66(5) |
| W36-O322 | 2.29(4) | W82-O395 | 2.04(5) |
| W37-O17  | 1.98(4) | W83-O90  | 1.77(4) |
| W37-O149 | 1.65(4) | W83-O100 | 1.86(5) |
| W37-O207 | 2.07(4) | W83-O132 | 2.29(4) |

---

---

|          |         |           |         |
|----------|---------|-----------|---------|
| W37-O277 | 1.78(4) | W83-O172  | 2.04(5) |
| W37-O292 | 1.94(4) | W83-O182  | 2.00(5) |
| W37-O344 | 2.24(4) | W83-O202  | 1.78(5) |
| W38-O37  | 1.70(4) | W84-O191  | 1.90(4) |
| W38-O189 | 1.99(5) | W84-O225  | 1.75(4) |
| W38-O232 | 2.28(5) | W84-O240  | 1.91(4) |
| W38-O275 | 2.00(4) | W84-O251  | 1.91(4) |
| W38-O301 | 1.72(4) | W84-O330  | 1.92(4) |
| W38-O316 | 1.88(4) | W84-O340  | 2.42(4) |
| W39-O137 | 1.88(4) | W85-O125  | 1.86(4) |
| W39-O143 | 1.90(4) | W85-O270  | 1.99(4) |
| W39-O245 | 1.75(4) | W85-O281  | 2.45(4) |
| W39-O290 | 2.38(4) | W85-O283  | 1.92(4) |
| W39-O376 | 1.93(4) | W85-O299  | 1.72(4) |
| W39-O377 | 1.91(4) | W85-O306  | 1.86(4) |
| W40-O191 | 1.98(4) | W86-O25   | 1.93(4) |
| W40-O229 | 1.77(3) | W86-O213  | 1.92(4) |
| W40-O230 | 1.69(4) | W86-O223  | 2.06(4) |
| W40-O242 | 1.98(4) | W86-O231  | 1.77(4) |
| W40-O258 | 1.96(4) | W86-O262  | 1.69(4) |
| W40-O340 | 2.31(4) | W86-O280  | 2.29(4) |
| W41-O103 | 2.30(4) | W88-O13   | 1.88(4) |
| W41-O147 | 1.72(4) | W88-O59   | 1.73(4) |
| W41-O209 | 1.71(5) | W88-O264  | 1.83(5) |
| W41-O227 | 1.90(4) | W88-O362  | 1.95(4) |
| W41-O249 | 1.97(4) | W88-O368  | 2.41(4) |
| W41-O273 | 2.16(4) | W88-O377  | 1.94(4) |
| W42-O94  | 1.77(5) | W89-O10   | 1.91(4) |
| W42-O96  | 2.48(5) | W89-O22   | 2.07(4) |
| W42-O158 | 1.77(5) | W89-O24   | 1.68(4) |
| W42-O188 | 1.99(5) | W89-O32   | 1.80(4) |
| W42-O194 | 1.70(5) | W89-O36   | 2.43(4) |
| W42-O212 | 2.09(5) | W89-O60   | 1.87(4) |
| W43-O96  | 2.41(5) | Eu11-O83  | 2.47(4) |
| W43-O108 | 1.95(5) | Eu11-O90  | 2.38(5) |
| W43-O186 | 1.69(5) | Eu11-O104 | 2.21(4) |
| W43-O212 | 1.79(5) | Eu11-O118 | 2.42(4) |
| W43-O2   | 2.23(3) | Eu11-O146 | 2.70(4) |
| W43-O23  | 2.23(3) | Eu11-O164 | 2.44(3) |
| W44-O101 | 2.06(3) | Eu11-O169 | 2.54(4) |
| W44-O224 | 1.76(3) | Eu11-O200 | 2.33(4) |
| W44-O300 | 2.30(4) | Eu12-O63  | 2.39(4) |
| W44-O311 | 1.92(4) | Eu12-O79  | 2.51(4) |
| W44-O314 | 1.73(4) | Eu12-O268 | 2.34(4) |

---

---

|          |         |           |         |
|----------|---------|-----------|---------|
| W44-O321 | 1.95(4) | Eu12-O271 | 2.61(4) |
| W45-O7   | 1.86(4) | Eu12-O277 | 2.26(4) |
| W45-O105 | 1.80(4) | Eu12-O305 | 2.56(4) |
| W45-O129 | 1.81(4) | Eu12-O307 | 2.40(4) |
| W45-O259 | 1.91(4) | Eu12-O336 | 2.34(4) |
| W45-O295 | 1.87(4) | Eu13-O39  | 2.33(4) |
| W45-O360 | 2.37(4) | Eu13-O85  | 2.46(4) |
| Eu1-O40  | 2.29(3) | Eu13-O145 | 2.36(4) |
| Eu1-O42  | 2.30(4) | Eu13-O233 | 2.30(4) |
| Eu1-O62  | 2.33(4) | Eu13-O271 | 2.67(4) |
| Eu1-O68  | 2.71(4) | Eu13-O307 | 2.37(4) |
| Eu1-O72  | 2.30(4) | Eu13-O315 | 2.48(4) |
| Eu1-O74  | 2.45(4) | Eu13-O329 | 2.50(3) |
| Eu1-O78  | 2.44(3) | Eu14-O5   | 2.31(4) |
| Eu1-O80  | 2.55(4) | Eu14-O87  | 2.43(4) |
| Eu2-O83  | 2.60(4) | Eu14-O175 | 2.47(4) |
| Eu2-O153 | 2.65(4) | Eu14-O298 | 2.68(4) |
| Eu2-O157 | 2.61(4) | Eu14-O315 | 2.58(4) |
| Eu2-O159 | 2.26(4) | Eu14-O329 | 2.58(4) |
| Eu2-O163 | 2.43(4) | Eu14-O337 | 2.31(4) |
| Eu2-O164 | 2.54(4) | Eu14-O349 | 2.62(4) |
| Eu2-O167 | 2.45(4) | Eu14-O353 | 2.41(3) |
| Eu2-O317 | 2.33(4) | Eu15-O41  | 2.30(4) |
| Eu2-O363 | 2.31(4) | Eu15-O161 | 2.40(3) |
| Eu3-O46  | 2.57(4) | Eu15-O268 | 2.52(4) |
| Eu3-O48  | 2.45(4) | Eu15-O305 | 2.48(4) |
| Eu3-O81  | 2.48(4) | Eu15-O331 | 2.52(4) |
| Eu3-O110 | 2.59(4) | Eu15-O333 | 2.62(4) |
| Eu3-O181 | 2.31(4) | Eu15-O342 | 2.41(3) |
| Eu3-O327 | 2.39(3) | Eu15-O372 | 2.59(4) |
| Eu3-O333 | 2.49(4) | Eu16-O19  | 2.51(4) |
| Eu3-O343 | 2.46(4) | Eu16-O228 | 2.42(4) |
| Eu3-O351 | 2.48(4) | Eu16-O284 | 2.30(4) |
| Eu4-O119 | 2.45(3) | Eu16-O304 | 2.35(4) |
| Eu4-O197 | 2.32(4) | Eu16-O319 | 2.46(4) |
| Eu4-O199 | 2.39(4) | Eu16-O322 | 2.71(4) |
| Eu4-O222 | 2.64(4) | Eu16-O325 | 2.41(3) |
| Eu4-O229 | 2.31(4) | Eu16-O350 | 2.27(3) |
| Eu4-O260 | 2.60(4) | Eu17-O31  | 2.39(4) |
| Eu4-O303 | 2.33(3) | Eu17-O123 | 2.29(4) |
| Eu4-O338 | 2.46(3) | Eu17-O139 | 2.35(4) |
| Eu5-O11  | 2.32(4) | Eu17-O179 | 2.34(4) |
| Eu5-O19  | 2.61(4) | Eu17-O322 | 2.63(4) |
| Eu5-O77  | 2.45(4) | Eu17-O342 | 2.43(4) |

---

---

|          |         |           |         |
|----------|---------|-----------|---------|
| Eu5-O89  | 2.42(3) | Eu17-O350 | 2.39(3) |
| Eu5-O171 | 2.66(4) | Eu17-O372 | 2.48(4) |
| Eu5-O252 | 2.32(4) | Eu18-O147 | 2.36(4) |
| Eu5-O288 | 2.56(4) | Eu18-O175 | 2.39(4) |
| Eu5-O319 | 2.55(4) | Eu18-O193 | 2.37(4) |
| Eu5-O341 | 2.51(4) | Eu18-O244 | 2.42(4) |
| Eu6-O177 | 2.50(4) | Eu18-O247 | 2.63(4) |
| Eu6-O221 | 2.31(4) | Eu18-O254 | 2.38(4) |
| Eu6-O239 | 2.61(4) | Eu18-O298 | 2.41(4) |
| Eu6-O265 | 2.33(4) | Eu18-O382 | 2.64(4) |
| Eu6-O266 | 2.65(4) | Eu19-O37  | 2.32(4) |
| Eu6-O324 | 2.46(4) | Eu19-O45  | 2.25(4) |
| Eu6-O328 | 2.39(4) | Eu19-O75  | 2.60(4) |
| Eu6-O355 | 2.41(4) | Eu19-O236 | 2.40(4) |
| Eu7-O51  | 2.26(4) | Eu19-O244 | 2.36(4) |
| Eu7-O153 | 2.38(3) | Eu19-O288 | 2.44(4) |
| Eu7-O163 | 2.43(4) | Eu19-O341 | 2.37(4) |
| Eu7-O165 | 2.60(4) | Eu19-O382 | 2.66(4) |
| Eu7-O219 | 2.29(4) | Eu20-O43  | 2.55(4) |
| Eu7-O222 | 2.54(3) | Eu20-O94  | 2.41(5) |
| Eu7-O224 | 2.36(4) | Eu20-O134 | 2.46(5) |
| Eu7-O303 | 2.41(4) | Eu20-O156 | 2.68(5) |
| Eu8-O55  | 2.32(4) | Eu20-O157 | 2.50(4) |
| Eu8-O77  | 2.40(4) | Eu20-O167 | 2.40(4) |
| Eu8-O155 | 2.57(4) | Eu20-O170 | 2.26(5) |
| Eu8-O171 | 2.50(4) | Eu20-O309 | 2.21(4) |
| Eu8-O266 | 2.60(4) | Eu21-O87  | 2.38(4) |
| Eu8-O297 | 2.36(4) | Eu21-O138 | 2.36(5) |
| Eu8-O320 | 2.33(4) | Eu21-O156 | 2.61(5) |
| Eu8-O328 | 2.36(4) | Eu21-O218 | 2.38(5) |
| Eu9-O21  | 2.29(4) | Eu21-O309 | 2.32(4) |
| Eu9-O48  | 2.37(4) | Eu21-O323 | 2.37(5) |
| Eu9-O102 | 2.37(4) | Eu21-O339 | 2.53(5) |
| Eu9-O110 | 2.62(4) | Eu21-O349 | 2.61(4) |
| Eu9-O114 | 2.48(4) | Eu22-O74  | 2.56(4) |
| Eu9-O118 | 2.33(4) | Eu22-O80  | 2.50(4) |
| Eu9-O146 | 2.63(4) | Eu22-O119 | 2.46(3) |
| Eu9-O180 | 2.36(4) | Eu22-O237 | 2.33(4) |
| Eu10-O40 | 2.38(3) | Eu22-O313 | 2.45(3) |
| Eu10-O46 | 2.48(4) | Eu22-O324 | 2.66(3) |
| Eu10-O50 | 2.33(4) | Eu22-O338 | 2.63(4) |
| Eu10-O52 | 2.41(4) | Eu22-O355 | 2.53(4) |
| Eu10-O54 | 2.21(4) | Eu22-O357 | 2.31(4) |
| Eu10-O68 | 2.58(4) | Se13-O19  | 1.68(3) |

---

---

|           |         |           |         |
|-----------|---------|-----------|---------|
| Eu10-O76  | 2.27(4) | Se13-O77  | 1.71(4) |
| Eu10-O327 | 2.47(4) | Se13-O325 | 1.71(4) |
| Se1-O83   | 1.71(4) | Se14-O155 | 1.68(4) |
| Se1-O167  | 1.71(4) | Se14-O171 | 1.69(4) |
| Se1-O169  | 1.65(4) | Se14-O341 | 1.73(4) |
| Se2-O237  | 1.73(4) | Se15-O247 | 1.73(4) |
| Se2-O252  | 1.69(4) | Se15-O298 | 1.65(4) |
| Se2-O328  | 1.80(4) | Se15-O315 | 1.66(4) |
| Se3-O119  | 1.68(3) | Se16-O303 | 1.77(4) |
| Se3-O239  | 1.65(4) | Se16-O317 | 1.70(4) |
| Se3-O324  | 1.75(4) | Se16-O357 | 1.66(4) |
| Se4-O159  | 1.70(4) | Se17-O153 | 1.72(4) |
| Se4-O335  | 1.74(4) | Se17-O164 | 1.71(4) |
| Se4-O337  | 1.71(4) | Se17-O165 | 1.64(4) |
| Se5-O40   | 1.70(4) | Se18-O78  | 1.64(4) |
| Se5-O313  | 1.67(3) | Se18-O80  | 1.70(3) |
| Se5-O327  | 1.72(3) | Se18-O355 | 1.67(4) |
| Se6-O118  | 1.74(4) | Se19-O74  | 1.69(4) |
| Se6-O181  | 1.63(4) | Se19-O260 | 1.67(3) |
| Se6-O363  | 1.64(3) | Se19-O338 | 1.71(4) |
| Se7-O75   | 1.74(4) | Se20-O11  | 1.68(4) |
| Se7-O288  | 1.68(4) | Se20-O244 | 1.72(4) |
| Se7-O319  | 1.70(4) | Se20-O353 | 1.64(4) |
| Se8-O31   | 1.62(4) | Se21-O89  | 1.70(4) |
| Se8-O268  | 1.73(4) | Se21-O342 | 1.72(3) |
| Se8-O372  | 1.71(4) | Se21-O350 | 1.76(4) |
| Se9-O85   | 1.67(4) | Se22-O110 | 1.70(4) |
| Se9-O87   | 1.75(4) | Se22-O114 | 1.66(4) |
| Se9-O329  | 1.76(4) | Se22-O351 | 1.70(4) |
| Se10-O5   | 1.67(4) | Se23-O79  | 1.70(4) |
| Se10-O41  | 1.72(4) | Se23-O161 | 1.72(4) |
| Se10-O307 | 1.73(3) | Se23-O305 | 1.72(4) |
| Se11-O46  | 1.69(4) | Se24-O175 | 1.73(4) |
| Se11-O48  | 1.69(4) | Se24-O339 | 1.65(5) |
| Se11-O52  | 1.58(4) | Se24-O349 | 1.69(4) |
| Se12-O43  | 1.74(4) |           |         |
| Se12-O157 | 1.72(4) |           |         |
| Se12-O163 | 1.66(4) |           |         |

---

## Section S4 Additional Figure

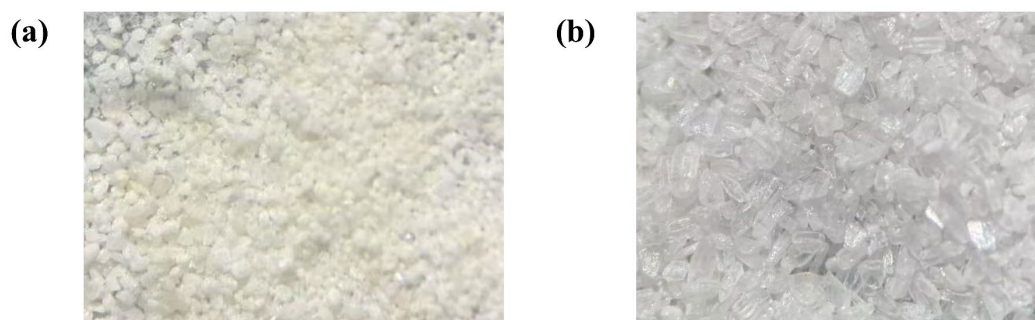

Figure S1. The photographs of the crystal morphology of **1-Eu** and **2-Eu**.

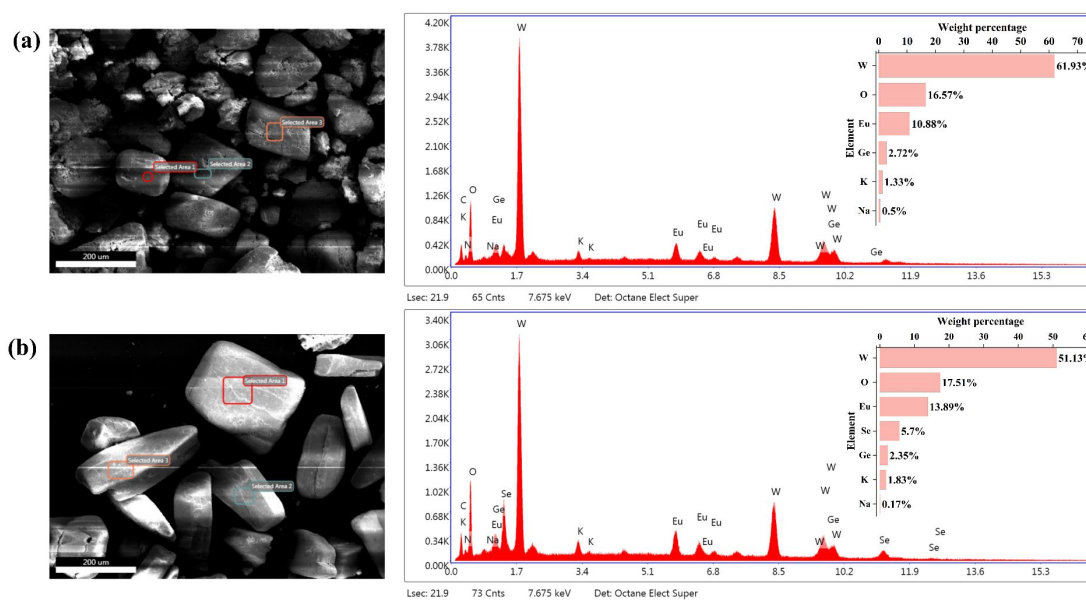

Figure S2. View of the EDS images in **1-Eu** (a) and **2-Eu** (b).

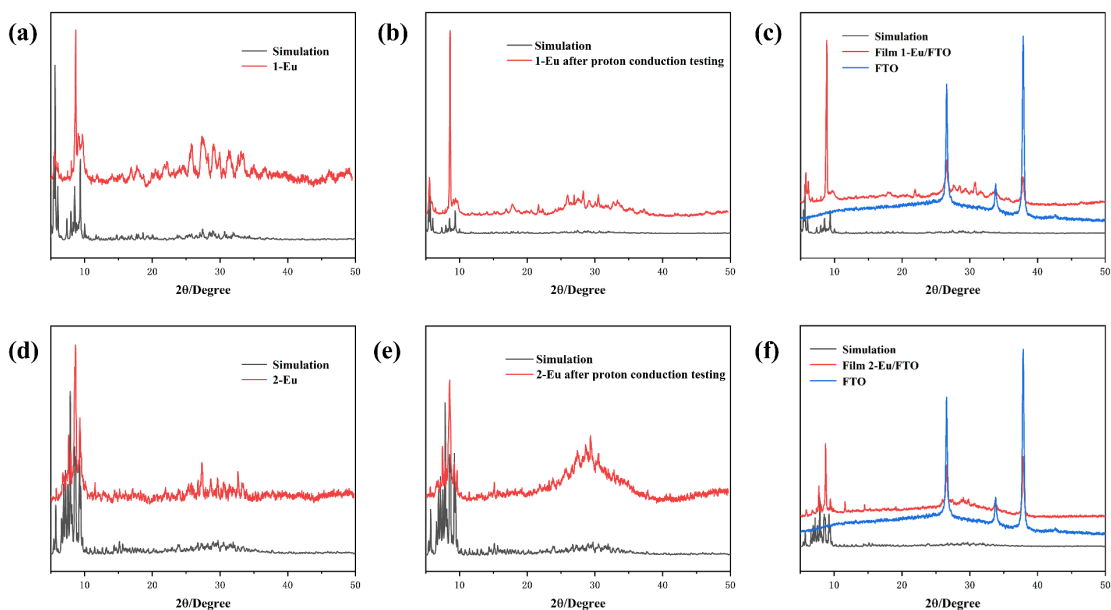

**Figure S3.** PXRD patterns of **1-Eu** (a) and **2-Eu** (d). Experimental PXRD pattern of **1-Eu** (b) and **2-Eu** (e) after proton conductivity test. Experimental PXRD pattern of **1-Eu** (c) and **2-Eu** (f) on FTO.

The principal peak positions in the XRD patterns of the two compounds correspond well between the theoretical simulations and the experimental measurements, while the differences in diffraction peak intensities are attributed to the anisotropic nature of the crystals.

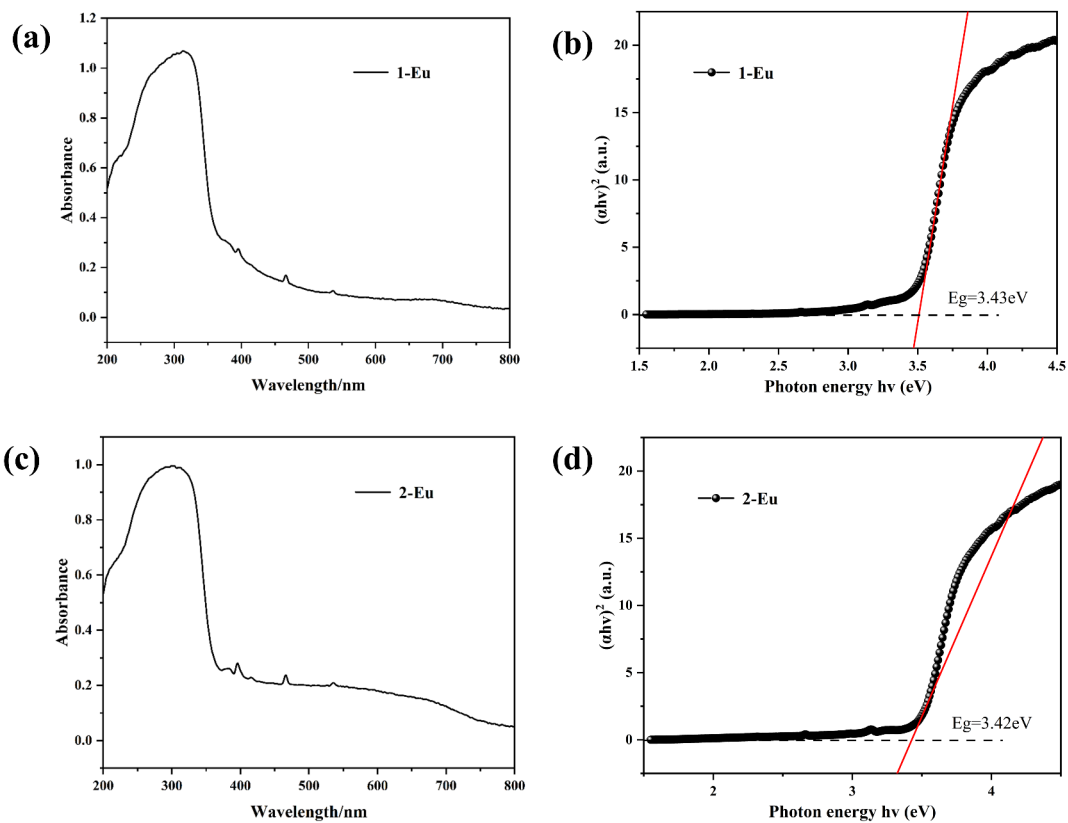

**Figure S4.** The UV spectrum of **1-Eu** (a) and **2-Eu** (c). Plots of  $[\alpha h\nu]^{1/2}$  vs  $h\nu$  (eV) of **1-Eu** (b) and **2-Eu** (d).

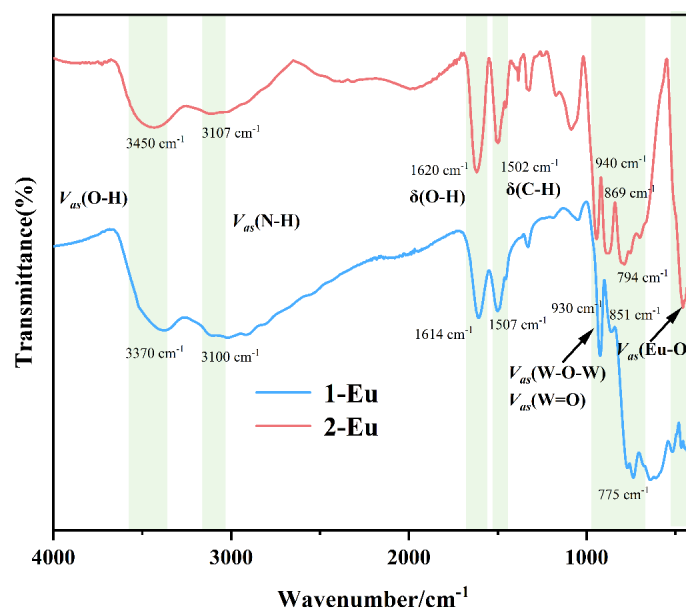

**Figure S5.** The IR spectrum of **1-Eu** and **2-Eu**.

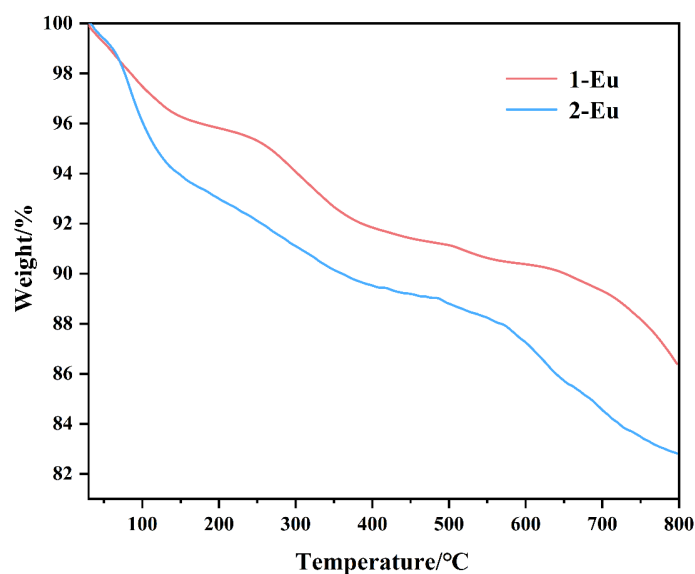

**Figure S6.** The thermogravimetric curve of **1-Eu** and **2-Eu**.

The thermogravimetric measurement of **1-Eu** and **2-Eu** was carried out from 30 to 800 °C under a N<sub>2</sub> atmosphere at a heating rate of 10 °C min<sup>-1</sup>. The thermogravimetric curve suggests that **1-Eu** undergoes a two-step weight loss and **2-Eu** undergoes a one-step weight loss (Figure. S6). For **1-Eu**, the first weight loss from 30 to 400 °C 8.24 % (calcd. 8.89 %) is attributed to the liberation of 13 free water molecules, 49 solvent-water molecules and 2 protonated dimethylamine; the second weight loss from 400 to 530 °C 1.01 % (calcd. 1.06 %) is attributed to the liberation of 8 coordinated water molecules; upon heating to 530 °C, the tungsten-oxygen cluster cage skeleton is beginning to collapse. For **2-Eu**, the weight loss from 30 to 400 °C 10.29 % (calcd. 9.95 %) is attributed to the liberation of 28 free water molecules, 118 solvent-water molecules, 4 coordinated water molecules and 1 protonated dimethylamine; upon heating to 400 °C, the tungsten-oxygen cluster cage skeleton is beginning to collapse.

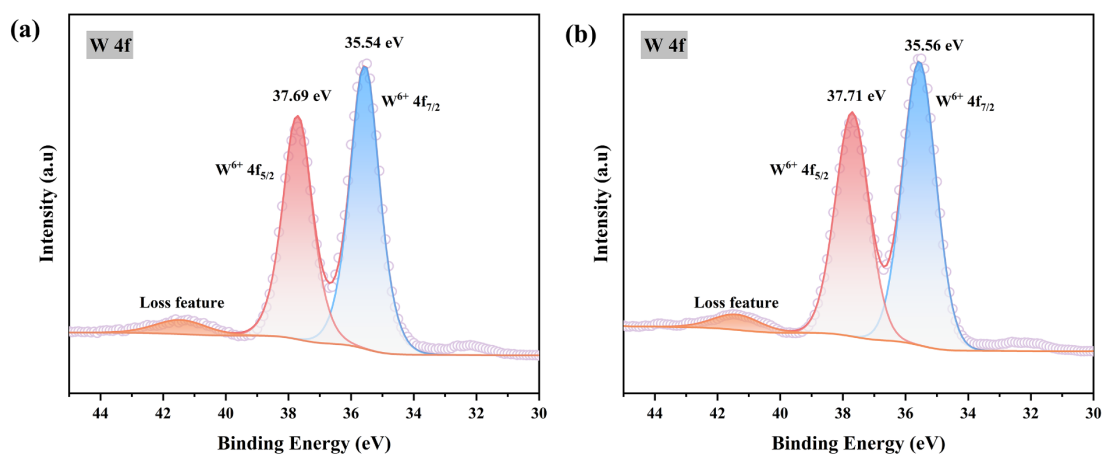

**Figure S7.** XPS curves of the W element of **1-Eu** (a) and **2-Eu** (b).

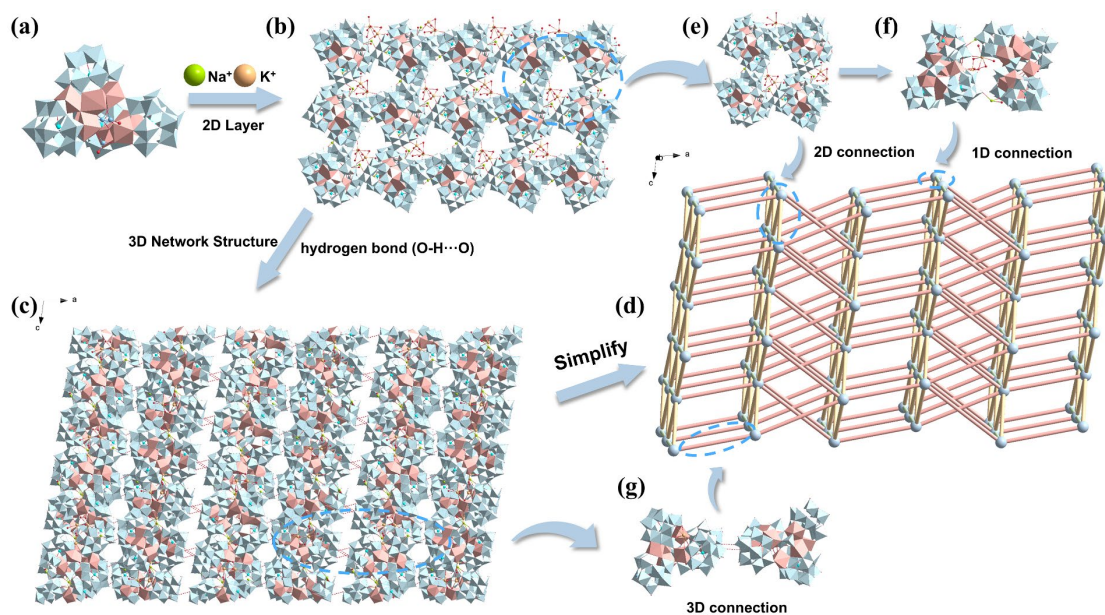

**Figure S8.** (a) Structure of **1-Eu**; (b) View of 2D layer; (c) View of 3D network structure; (d) The three-dimensional topology of **1-Eu**; (e) Two dimensional layered structural element; (f) One dimensional chain like structural element; (g) 3D network structure element.

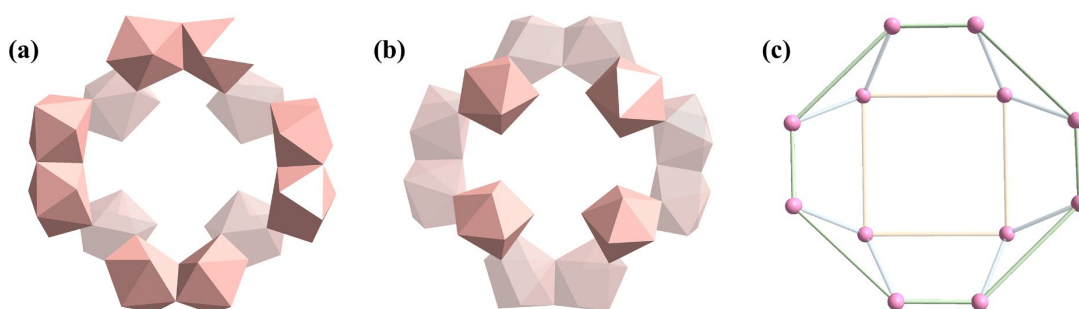

**Figure S9.** (a) Sub-structure in the {Eu<sub>12</sub>} unit; (b) Sub-substructure within the {Eu<sub>12</sub>} unit; (c) Spatial connectivity patterns of Eu ions in {Eu<sub>12</sub>}.

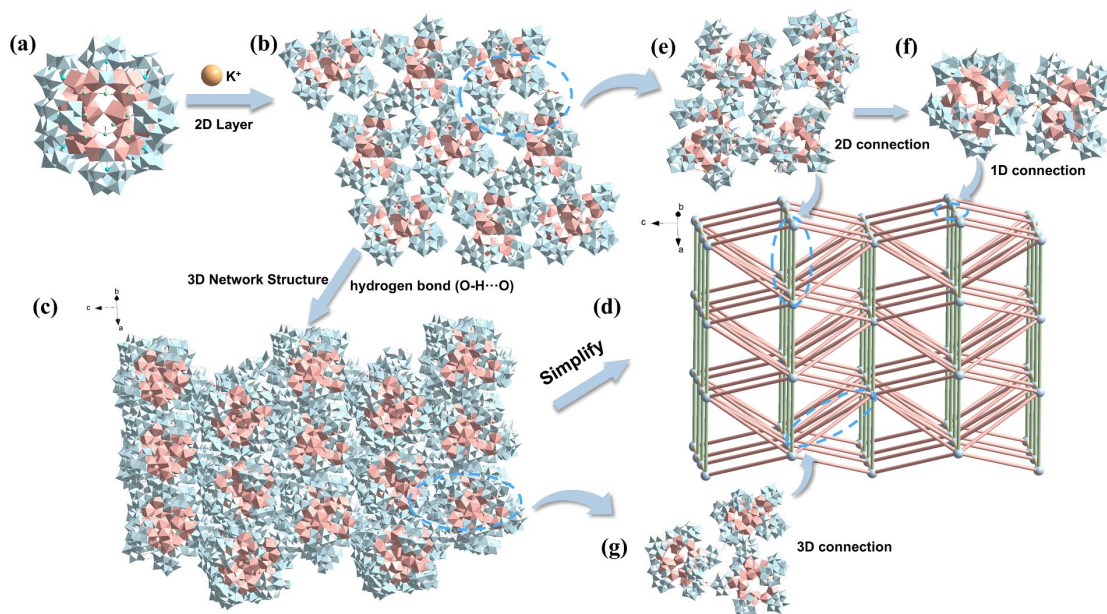

**Figure S10.** (a) Structure of **2-Eu**; (b) View of 2D layer; (c) View of 3D network structure; (d) The three-dimensional topology of **2-Eu**; (e) Two dimensional layered structural element; (f) One dimensional chain like structural element; (g) 3D network structure element.

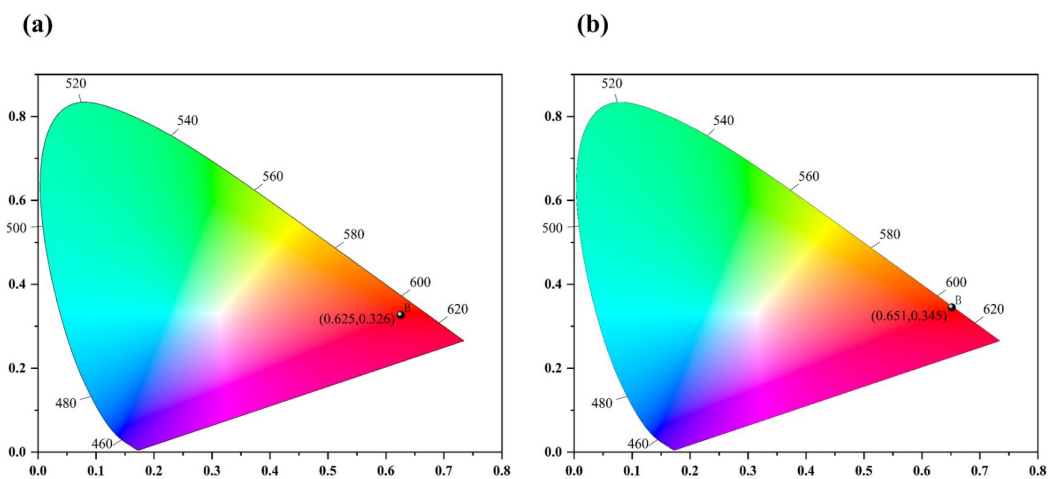

**Figure. S11.** The CIE of 1-Eu (a) and 2-Eu (b).

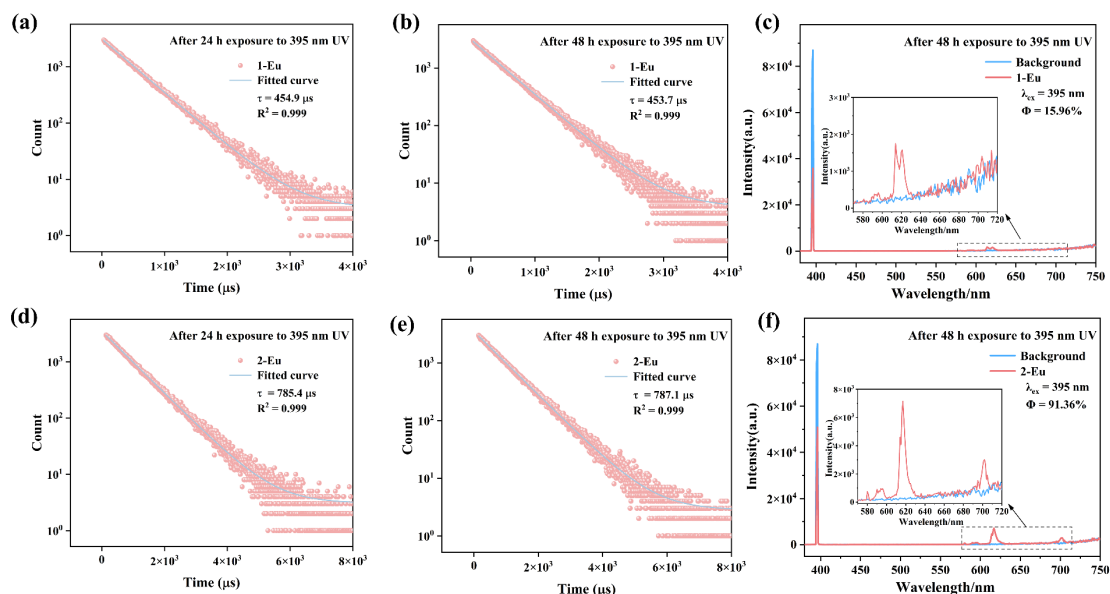

**Figure S12.** Lifetime decay curve of (a) **1-Eu** and (d) **2-Eu** ( $\lambda_{\text{ex}} = 395$  nm) after 24 h exposure to 395 nm UV. Lifetime decay curve of (b) **1-Eu** and (e) **2-Eu** ( $\lambda_{\text{ex}} = 395$  nm) after 48 h exposure to 395 nm UV. The quantum yield of (c) **1-Eu** and (f) **2-Eu** ( $\lambda_{\text{ex}} = 395$  nm) after 48 h exposure to 395 nm UV.

The results show that **1-Eu** retains nearly unchanged lifetime and quantum yield after irradiation, indicating excellent photostability (Figure S12). For **2-Eu**, only a slight decrease was observed: the luminescence lifetime decreased from 818.5  $\mu\text{s}$  to 785.4  $\mu\text{s}$  after 24 h and 787.1  $\mu\text{s}$  after 48 h, while the quantum yield decreased from 93.36% to 91.36% after 48 h (Figure S12). These results demonstrate that **2-Eu** still possesses good photostability under prolonged UV irradiation. The minor decrease in the luminescence performance of **2-Eu** may be attributed to slight photoinduced perturbations of the Eu(III) local coordination environment or the lattice microenvironment during continuous irradiation. Such subtle structural rearrangements, possibly involving weakly bound solvent molecules or hydrogen-bonding interactions, may introduce additional O-H vibrational oscillators and thus slightly increase the non-radiative decay probability.

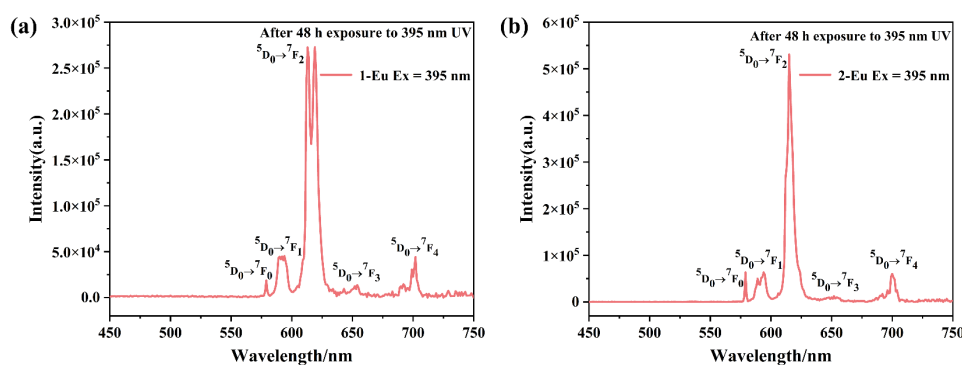

**Figure S13.** Emission spectra of (a) **1-Eu**; (b) **2-Eu** ( $\lambda_{\text{ex}} = 395$  nm) after 48 h exposure to 395 nm UV.

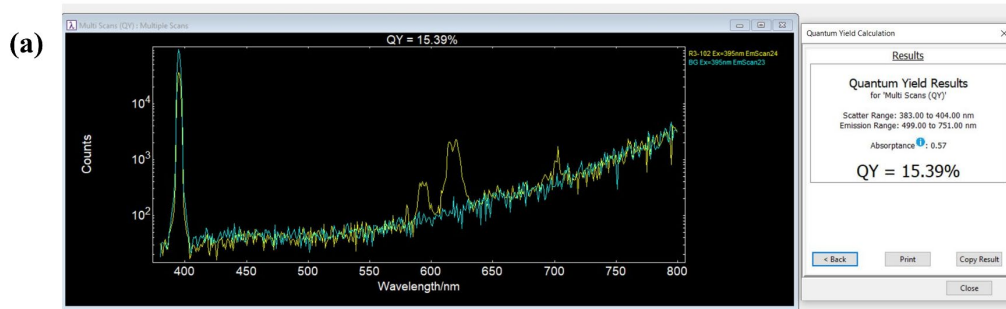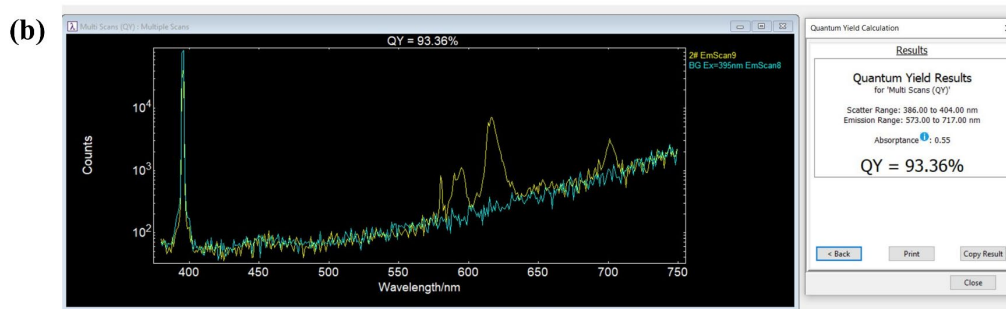

Figure S14. Original graph of quantum yield of 1-Eu (a) and 2-Eu (b).

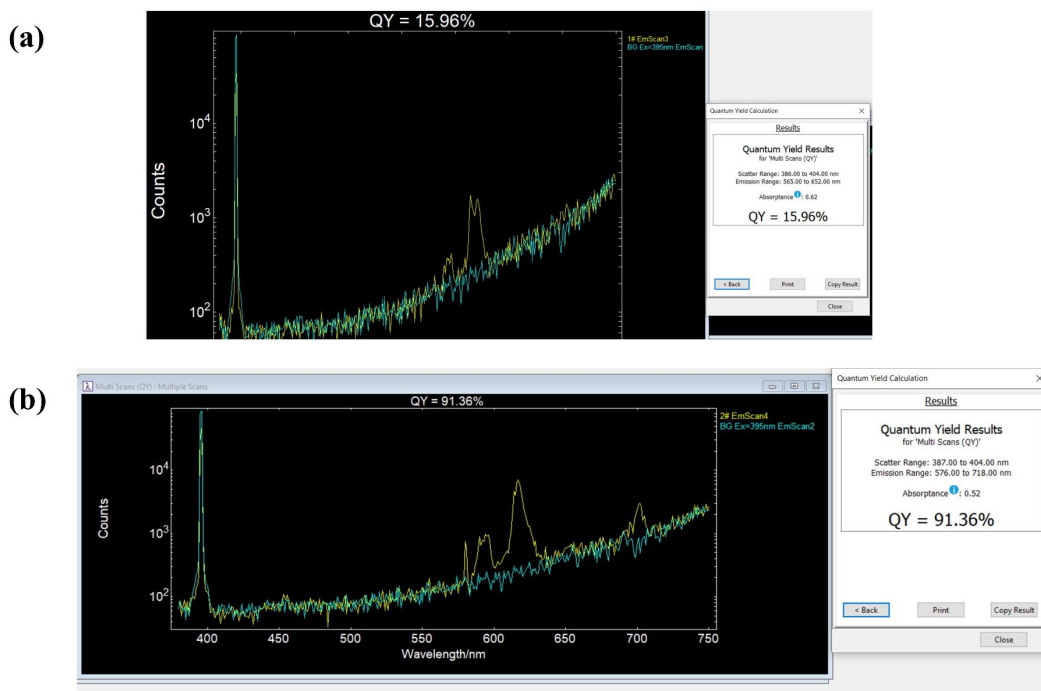

Figure S15. Original graph of quantum yield of 1-Eu (a) and 2-Eu (b) after 48 h exposure to 395 nm UV.

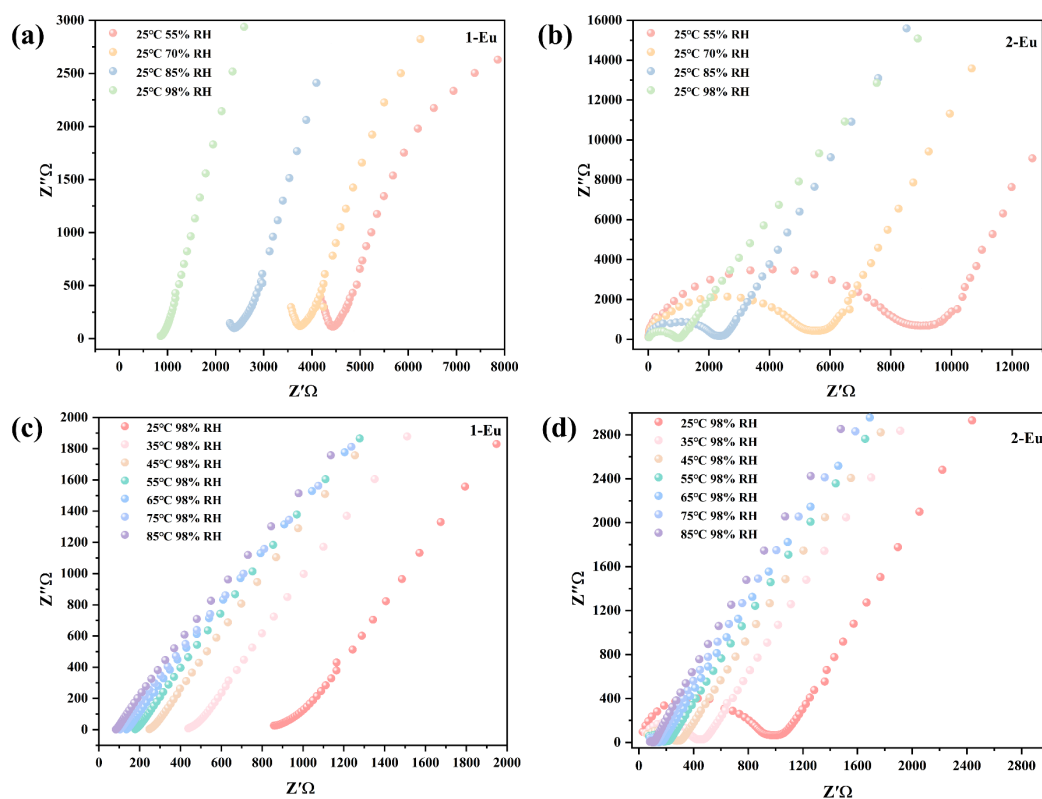

**Figure S16.** Nyquist plots at 55-98% RH and 298 K for **1-Eu** (a) and **2-Eu** (b). Nyquist plots at 25°C -85°C and 98% RH for **1-Eu** (c) and **2-Eu** (d).

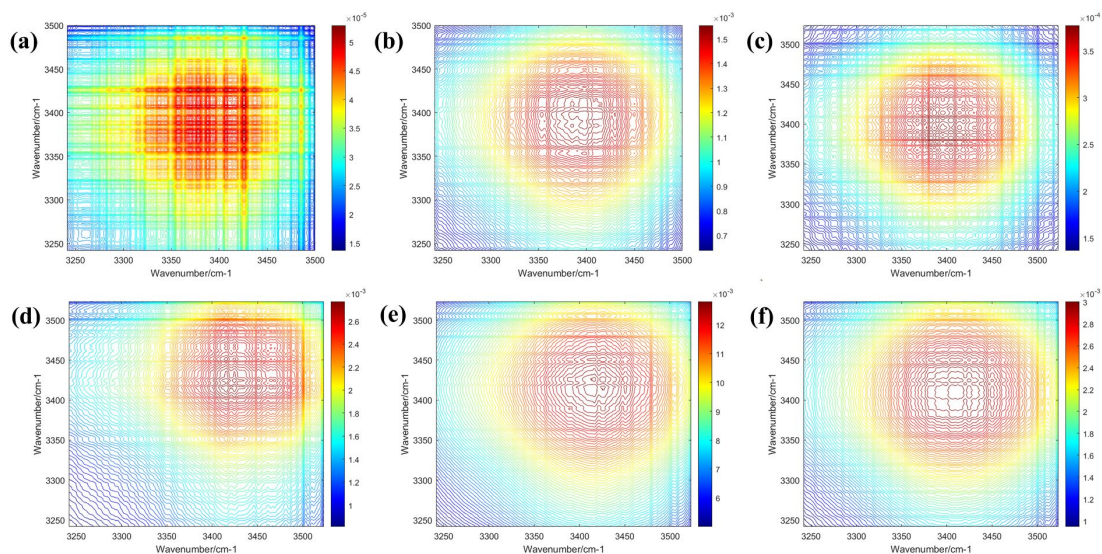

**Figure S17.** Synchronous two-dimensional correlation infrared spectra of **1-Eu** (a) and **2-Eu** (d) under 20-50 °C thermal perturbation. 2D COS-IR spectra of **1-Eu** (b) and **2-Eu** (e) under 50-90 °C thermal perturbation. 2D COS-IR spectra of **1-Eu** (c) and **2-Eu** (f) under 90-120 °C thermal perturbation.

In the two-dimensional infrared spectra under thermal perturbation, the intensities of the  $\nu_{as}(\text{O-H})$  response peaks for both compounds increase within the temperature

intervals of 20-50 °C and 50-90 °C, respectively. This indicates that from 20 °C to 90 °C, the hydrogen-bond vibrations are enhanced with rising temperature. In contrast, in the 90-120 °C range, the intensity of the  $\nu_{as}(\text{O-H})$  response peaks decreases compared to that in the 50-90 °C interval. This reduction is attributed to the disruption of hydrogen bonds due to the loss of water molecules, leading to a corresponding decrease in the spectral.

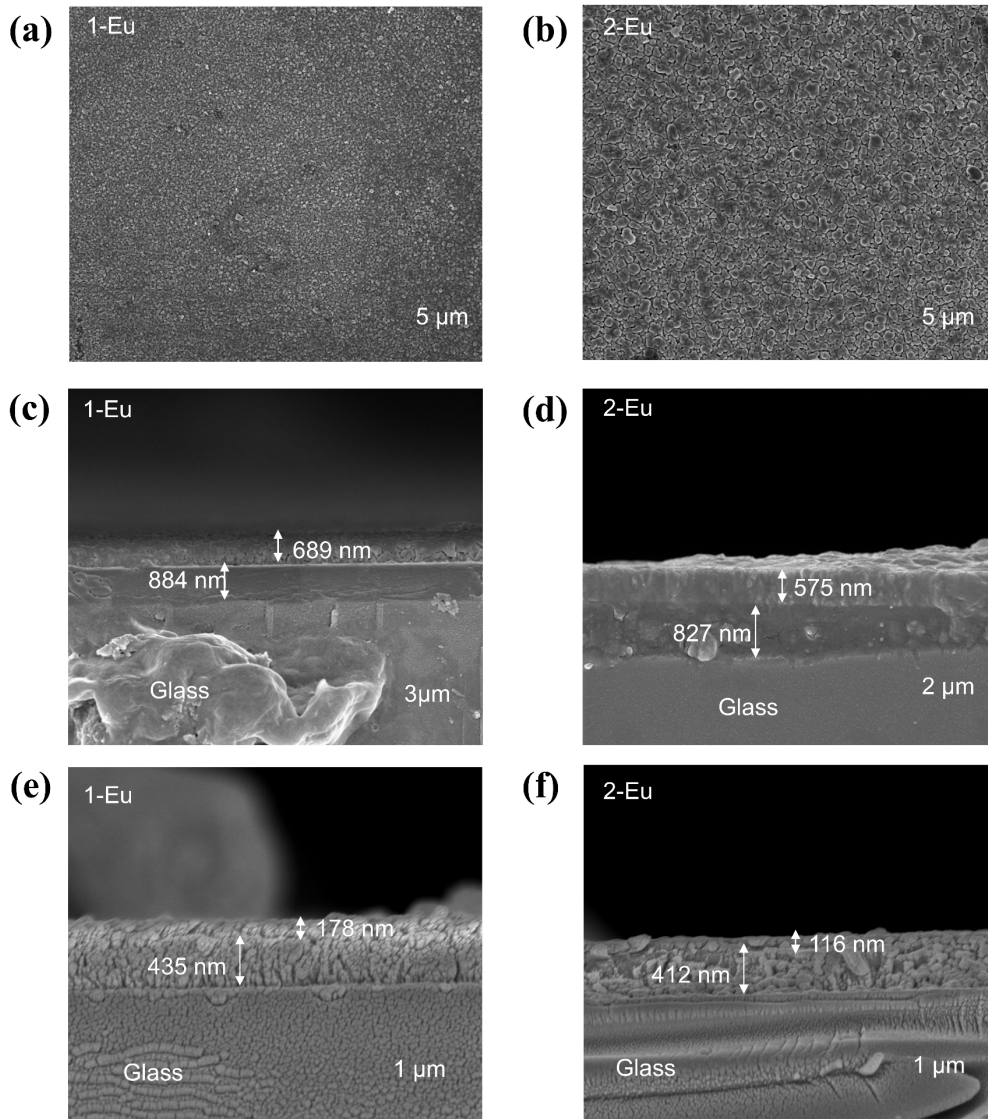

**Figure S18.** The surface SEM image of the (a) FTO/1-Eu/Ag; (b) FTO/2-Eu/Ag memory device. The cross-sectional SEM images of the (c) and (e) FTO/1-Eu/Ag; (d) and (f) FTO/2-Eu/Ag memory device.

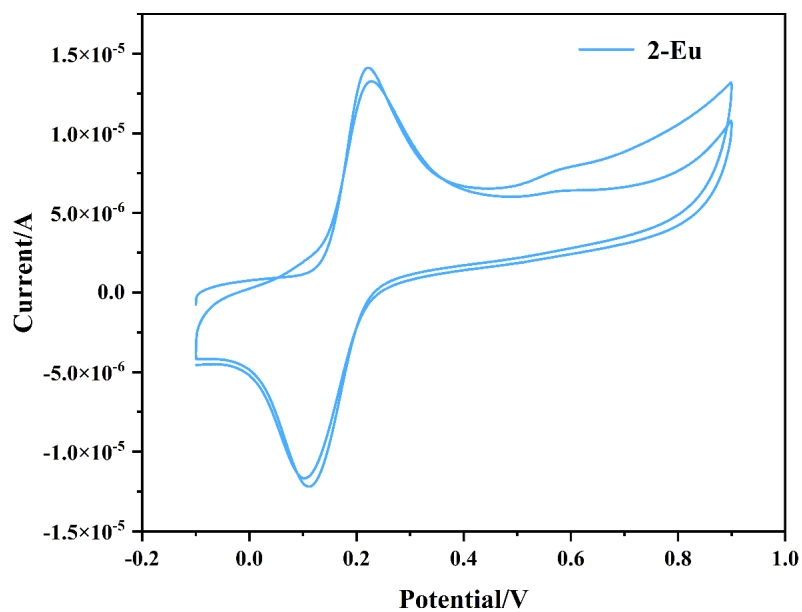

**Figure S19.** CV curves of 2-Eu.

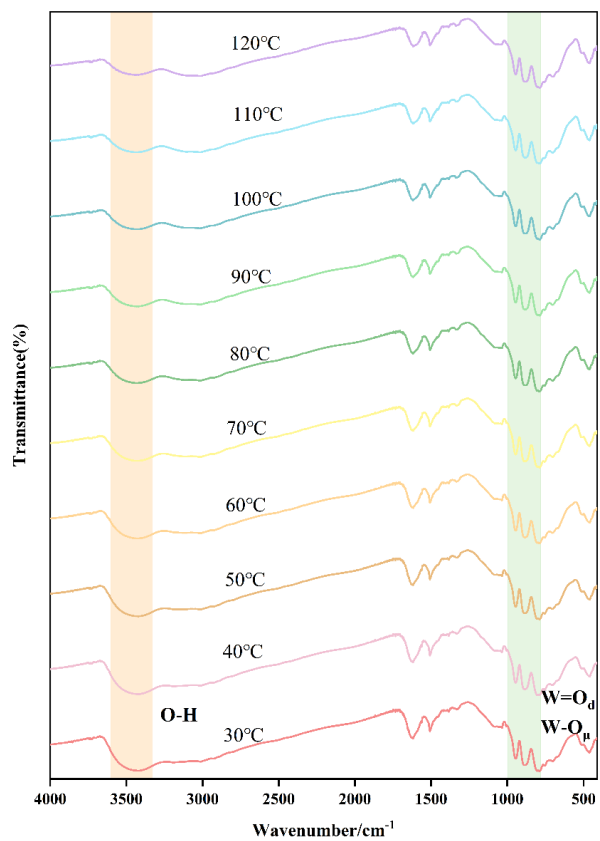

**Figure S20.** Temperature-dependent IR spectra of 2-Eu.

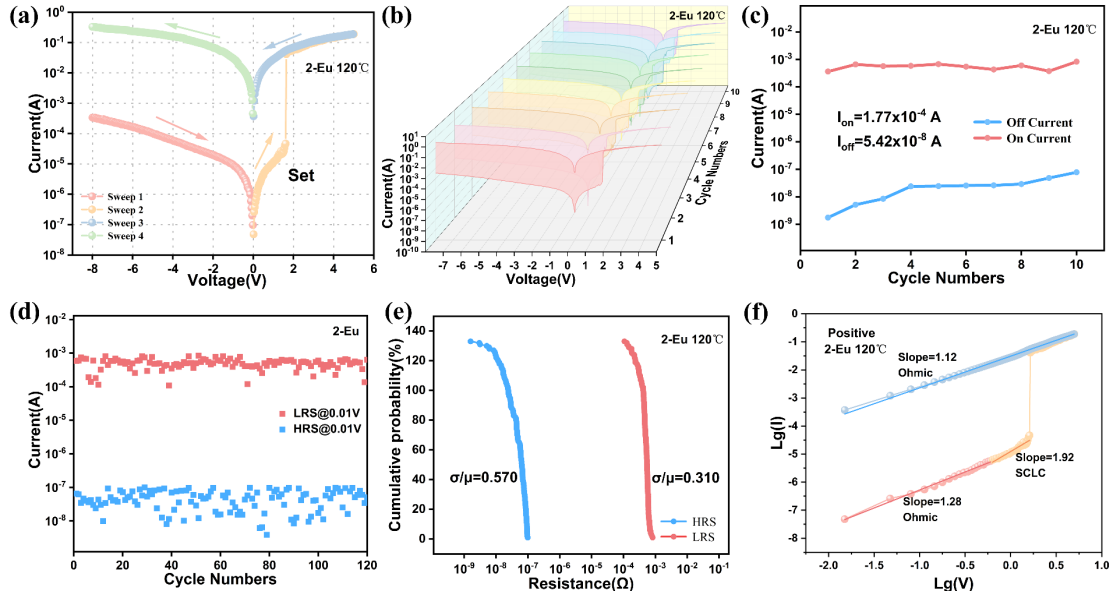

**Figure S21.** (a)  $I$ - $V$  characteristics of FTO/2-Eu/Ag device at 120°C; (b) The  $I$ - $V$  curves of 10 random samples of FTO/2-Eu/Ag device at 120°C; (c) Stabilities of 10 random samples FTO/2-Eu/Ag device at HRS and LRS states (read at 0.01V) at 120°C; (d) The endurance performance of device in HRS and LRS at 120°C; (e) The cumulative probability (CP) distributions of the HRS and LRS values for the device at 120°C; (f) Double logarithmic plot of the typical  $I$ - $V$  characteristics in the positive voltage sweeping regions of FTO/2-Eu/Ag at 120°C.

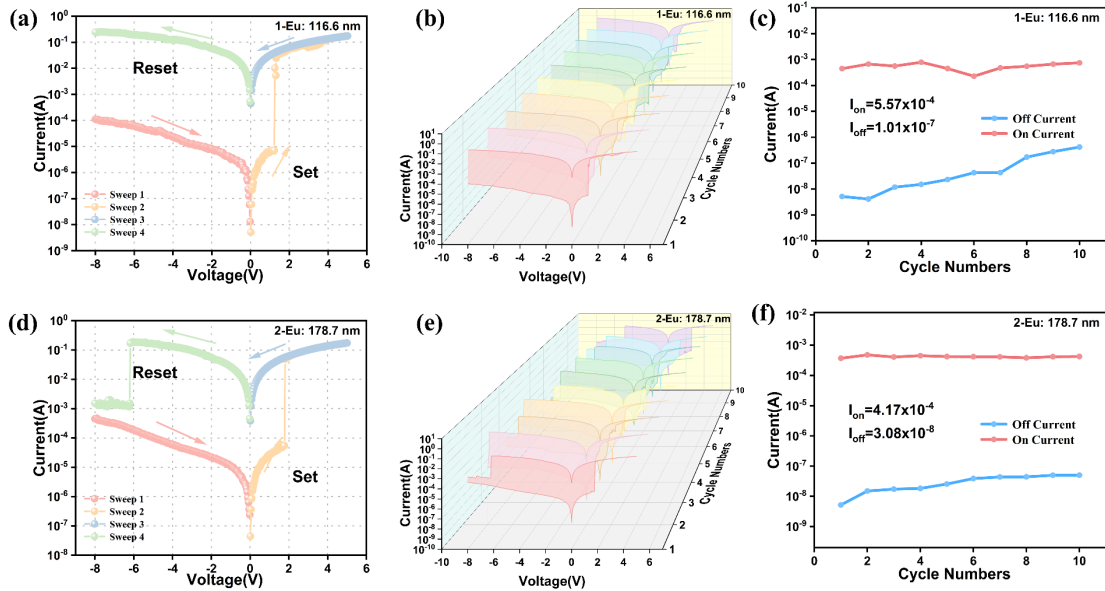

**Figure S22.** For FTO/1-Eu/Ag device (thickness: 116.6 nm): (a)  $I$ - $V$  characteristic of a single device; (b)  $I$ - $V$  curves of 10 random samples; (c) Stability of HRS and LRS states for 10 random samples (read at 0.01 V). For FTO/2-Eu/Ag device (thickness: 178.7 nm): (d)  $I$ - $V$  characteristic of a single device; (e)  $I$ - $V$  curves of 10 random samples; (f) Stability of HRS and LRS states for 10 random samples (read at 0.01 V).

To further evaluate the effect of thickness scaling on device performance and its relevance to miniaturization, thinner devices with active-layer thicknesses of approximately 100-200 nm were fabricated and tested. At the same measurement position, one  $I$ - $V$  sweep was recorded every 2 min, and 10 consecutive  $I$ - $V$  curves were collected for each device (Figure S20). Both devices preserved their original switching modes after thickness reduction: FTO/1-Eu/Ag showed WORM switching with an ON/OFF ratio of  $5.51 \times 10^3$  and  $V_{\text{SET}} = 1.19$  V, while FTO/2-Eu/Ag retained bipolar resistive switching with an ON/OFF ratio of  $1.35 \times 10^4$ ,  $V_{\text{SET}} = 1.27$  V, and  $V_{\text{RESET}} = -6.60$  V. Compared with the thicker devices (500-700 nm), no significant degradation in the ON/OFF current switching ratio or switching voltage was observed, indicating that thickness reduction has a limited influence on device performance.

## Section S5 Notes and references

1. S. Wang, T. Gong, Z. Wen, L. Chen and J. Zhao, First phosphite-bridging lanthanide–bismuth heterometallic selenotungstates and their ratio-metric-temperature luminescence sensing properties, *Journal of Materials Chemistry A*, 2025, **13**, 31530-31541.
2. S. Wang, T. Gong, L. Chen and J. Zhao, Pyrazine Dicarboxylic Acid and Phosphite-Bridging Lanthanide-Incorporated Tellurotungstates and Their Fluorescence Performances, *Inorganic Chemistry*, 2024, **63**, 20470-20481.
3. J. Wang, P. Ma, S. Li, Q. Xu, Y. Li, J. Niu and J. Wang, Polyoxotungstate Cluster Species Connected by Glutamic Acid and Europium, *Inorganic Chemistry*, 2019, **58**, 57-60.
4. S. Yang, T. Gong, Y. Dai, X. Xiao, J. Liu, L. Chen and J. Zhao, An Unusual Bismuth–Antimony–Europium Cluster-Imbedded Polyoxotungstate and Its Bidirectional Luminescence Detection, *Inorganic Chemistry*, 2023, **62**, 17861-17869.
5. Y.-F. Cao, W.-J. Xia, Y.-Q. Sun, X.-X. Li and S.-T. Zheng, Two polyoxotungstates containing lantern-shaped Eu<sub>20</sub>-oxo nanocages for information encryption and proton conduction, *Chinese Chemical Letters*, 2025, 111978.
6. W.-J. Mi, X.-R. Zhou, G.-Q. Ke, Y.-P. Chen and H.-H. Li, Photoluminescence Properties and Stable Bipolar Resistive Switching Behavior of Two Eu(III)-Doped Hexameric Selenotungstates, *Inorganic Chemistry*, 2025, **64**, 19647-19659.
7. Z. Li, Z.-H. Lv, H. Yu, Y.-Q. Sun, X.-X. Li and S.-T. Zheng, Giant Ln<sub>30</sub>-Cluster-Embedded Polyoxotungstate Nanoclusters with Exceptional Proton-Conducting and Luminescent Properties, *CCS Chemistry*, 2022, **4**, 2938-2945.
8. Q. Shang, K. Shen, D. Zhao, X. Wang, Y. Wei, H. Wang, G. Wang, D. Zhang and J. Niu, Rare-earth-induced peroxo-phosphotungstates: Enhanced proton conductivity in corresponding membranes, *Polyoxometalates*, 2025, **4**, 9140077.
9. P. M. Unnikrishnan, G. Premanand and S. K. Das, Polyoxometalate-driven assembly of inorganic–organic hybrid materials: Proton conductivity studies, *Journal of Chemical Sciences*, 2025, **137**, 13.
10. W. Lei, H. Li, M. Yang, J. Liu, W. Chen, P. Ma, J. Niu and J. Wang, Controllable Synthesis and Ultrahigh Proton Conduction of a Hydrogen-Bond Network, *Inorganic Chemistry*, 2024, **63**, 20492-

- 20500.
11. H.-P. Xiao, R.-T. Zhang, Z. Li, Y.-F. Xie, M. Wang, Y.-D. Ye, C. Sun, Y.-Q. Sun, X.-X. Li and S.-T. Zheng, Organoamine-Directed Assembly of 5p–4f Heterometallic Cluster Substituted Polyoxometalates: Luminescence and Proton Conduction Properties, *Inorganic Chemistry*, 2021, **60**, 13718-13726.
  12. J.-H. Liu, L.-D. Lin, G.-Q. Wang, L.-Y. Li, Y.-Q. Sun, X.-X. Li and S.-T. Zheng, All-inorganic open frameworks based on gigantic four-shell Ln@W8@Ln8@(SiW12)6 clusters, *Chemical Communications*, 2020, **56**, 10305-10308.
  13. B. Chen, Y.-R. Huang, K.-Y. Song, X.-L. Lin, H.-H. Li and Z.-R. Chen, Molecular Nonvolatile Memory Based on [ $\alpha$ -GeW12O40]4–/Metalloviologen Hybrids Can Work at High Temperature Monitored by Chromism, *Chemistry of Materials*, 2021, **33**, 2178-2186.
  14. Y.-R. Huang, X.-L. Lin, B. Chen, H.-D. Zheng, Z.-R. Chen, H.-H. Li and S.-T. Zheng, Thermal-Responsive Polyoxometalate–Metalloviologen Hybrid: Reversible Intermolecular Three-Component Reaction and Temperature-Regulated Resistive Switching Behaviors, *Angewandte Chemie International Edition*, 2021, **60**, 16911-16916.
  15. H.-B. Chen, M.-Y. He, T. Li, C.-C. Deng, H.-P. Xiao, M.-Q. Qi, X.-J. Kong, H.-H. Li, X.-X. Li and S.-T. Zheng, Exploring the role of viologen and iodocuprate in the enhanced resistive switching performance of Anderson polyoxometalate-based three-component hybrids, *Journal of Materials Chemistry C*, 2024, **12**, 13555-13561.
  16. Y.-F. Cao, Y.-J. Lin, X.-X. Li, Y.-Q. Sun and S.-T. Zheng, Two resistance-switchable hybrid polyoxotantalates based on {Co2Ta12} clusters, *CrystEngComm*, 2024, **26**, 3527-3534.
  17. Y.-J. Wang, N. Shi, C. Sun, Y.-Q. Sun and S.-T. Zheng, Reversible Thermochromism and Stable Resistance Switching Behaviors Based on a Co(III)-Complex-Linked Polyoxoniobate, *Inorganic Chemistry*, 2023, **62**, 10675-10683.
